# Supplementary material for: A mild and efficient amide formation reaction mediated by P(OEt)3 and iodine
Source: Royal Society of Chemistry journal article supplement (doi:10.1039/c5ra18459b), 2015-01-01

# Supplementary Information

## for

# A Mild and Efficient Amide Formation Reaction Mediated by P(OEt)<sub>3</sub> and Iodine

Pei-Jiang Chen, Hai-Yang Wang, Ai-Yun Peng\*

School of Chemistry & Chemical Engineering, Sun Yat-sen University, 135 Xingangxi Lu,  
Guangzhou, 510275, China

[cespay@mail.sysu.edu.cn](mailto:cespay@mail.sysu.edu.cn)

## List of contents

|                                                              |       |
|--------------------------------------------------------------|-------|
| General procedure and characterization data of 3a–3r.....    | S2–S6 |
| <sup>1</sup> H / <sup>13</sup> C NMR spectra of 3a.....      | S7    |
| <sup>1</sup> H / <sup>13</sup> C NMR spectra of 3b.....      | S8    |
| <sup>1</sup> H / <sup>13</sup> C NMR spectra of 3c.....      | S9    |
| <sup>1</sup> H / <sup>13</sup> C NMR spectra of 3d.....      | S10   |
| <sup>1</sup> H / <sup>13</sup> C NMR spectra of 3e.....      | S11   |
| <sup>1</sup> H / <sup>13</sup> C NMR spectra of 3f.....      | S12   |
| <sup>1</sup> H / <sup>13</sup> C NMR spectra of 3g.....      | S13   |
| <sup>1</sup> H / <sup>13</sup> C NMR spectra of 3h.....      | S14   |
| <sup>1</sup> H / <sup>13</sup> C NMR spectra of 3i.....      | S15   |
| <sup>1</sup> H / <sup>13</sup> C NMR spectra of 3j.....      | S16   |
| <sup>1</sup> H / <sup>13</sup> C NMR spectra of 3k.....      | S17   |
| <sup>1</sup> H / <sup>13</sup> C NMR spectra of 3l.....      | S18   |
| <sup>1</sup> H / <sup>13</sup> C NMR spectra of 3m.....      | S19   |
| <sup>1</sup> H / <sup>13</sup> C NMR spectra of 3n.....      | S20   |
| <sup>1</sup> H / <sup>13</sup> C NMR spectra of 3o.....      | S21   |
| <sup>1</sup> H / <sup>13</sup> C NMR spectra of 3p.....      | S22   |
| <sup>1</sup> H / <sup>13</sup> C NMR/HPLC spectra of 3q..... | S23   |
| <sup>1</sup> H / <sup>13</sup> C NMR/HPLC spectra of 3r..... | S25   |

**General Remarks:** The  $^1\text{H}$  and  $^{13}\text{C}$  NMR spectra were recorded on a Varian Mercury-Plus 300 or Varian INOVA 400 NMR instrument. All melting points are uncorrected.  $\text{CH}_2\text{Cl}_2$ ,  $\text{CH}_3\text{CN}$ , DMF, and  $\text{Et}_3\text{N}$  were distilled from  $\text{CaH}_2$ , and THF was freshly distilled from Na prior to use. All other reagents were obtained from commercial sources and were used without further purification. Column chromatography was performed on 200–300 mesh silica gel. Thin-layer chromatography was conducted on Kieselgel60 F254.

**General procedure for the synthesis of amides 3a-3r:**

A solution of  $\text{P}(\text{OEt})_3$  (1.0 mmol) in  $\text{CH}_2\text{Cl}_2$  (5 mL) was added successively  $\text{I}_2$  (1.0 mmol), **1** (1.0 mmol) and tertiary amine ( $\text{Et}_3\text{N}$  or N-methylmorpholine, 1.5 mmol) at 0 °C and then stirred at room temperature for 30 minutes. After addition of amine **2** (1.2 mmol) directly or the solution of amine's hydrochloride salt in DMF with one equivalent of tertiary amine to the mixture, the reaction mixture was stirred for 2–12 hours indicated in Table 2 and then diluted with  $\text{CH}_2\text{Cl}_2$  (60 mL), washed with aqueous  $\text{NH}_4\text{Cl}$ , 5% NaOH and brine, dried ( $\text{Na}_2\text{SO}_4$ ), and evaporated in vacuo. The residue was pure enough for the spectroscopic analysis, or purified by flash column chromatography on silica gel using hexane/EtOAc (12:1–4:1) as eluent, or recrystallize with ether to give the corresponding products **3a-3r**.

**N-(n-butyl)benzamide (3a)**<sup>[1]</sup>

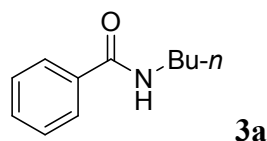

Oil. Yield: 75%.  $^1\text{H}$  NMR (400 MHz,  $\text{CDCl}_3$ ):  $\delta$  7.79 (d,  $J = 7.7$  Hz, 2H), 7.52 (t,  $J = 7.2$  Hz, 1H), 7.46 (t,  $J = 7.5$  Hz, 2H), 6.21 (s, 1H), 3.54–3.44 (m, 2H), 1.69–1.58 (m, 2H), 1.51–1.39 (m, 2H), 0.99 (t,  $J = 7.3$  Hz, 3H);  $^{13}\text{C}$  NMR (101 MHz,  $\text{CDCl}_3$ ):  $\delta$  167.7, 134.8, 131.3, 128.5, 126.9, 39.8, 31.7, 20.2, 13.8.

**N-cyclohexylbenzamide (3b)**<sup>[2]</sup>

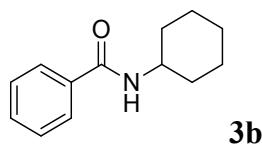

Oil. Yield: 95%.  $^1\text{H}$  NMR (400 MHz,  $\text{CDCl}_3$ ):  $\delta$  7.78 (d,  $J = 7.8$  Hz, 2H), 7.47 (dt,  $J = 26.8, 7.3$  Hz, 3H), 6.06 (s, 1H), 4.12 – 3.89 (m, 1H), 2.05 (d,  $J = 10.0$  Hz, 2H), 1.78 (d,  $J = 13.3$  Hz, 2H), 1.68 (d,  $J = 12.9$  Hz, 1H), 1.45 (dd,  $J = 24.8, 12.3$  Hz, 2H), 1.35 – 1.12 (m, 3H);  $^{13}\text{C}$  NMR (101 MHz,  $\text{CDCl}_3$ ):  $\delta$  166.6, 135.1, 131.2, 128.5, 126.8, 48.7, 33.3, 25.6, 24.9.

### 1-benzoyl-pyrrolidine (3c)<sup>[3]</sup>

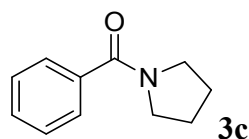

Oil. Yield: 82%. <sup>1</sup>H NMR (400 MHz, CDCl<sub>3</sub>): δ 7.45–7.55 (m, 2H), 7.45–7.33 (m, 3H), 3.64 (s, 2H), 3.41 (s, 2H), 1.95 (s, 2H), 1.87 (s, 2H); <sup>13</sup>C NMR (101 MHz, CDCl<sub>3</sub>): δ 169.7, 137.2, 129.8, 128.2, 127.1, 49.6, 46.2, 26.4, 24.5.

### 1-benzoyl-piperidine (3d)<sup>[4]</sup>

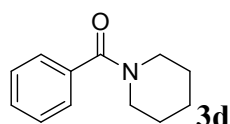

Oil. Yield: 97%. <sup>1</sup>H NMR (300 MHz, CDCl<sub>3</sub>): δ 7.38 (s, 5H), 3.71 (s, 2H), 3.34 (s, 2H), 1.59–1.75 (m, 6H); <sup>13</sup>C NMR (101 MHz, CDCl<sub>3</sub>): δ 170.3, 136.5, 129.4, 128.4, 126.8, 48.8, 43.1, 26.5, 25.6, 24.6.

### 1-benzoyl-morpholine(3e)<sup>[3]</sup>

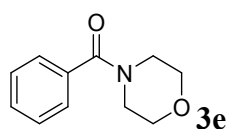

Oil. Yield: 91%. <sup>1</sup>H NMR (300 MHz, CDCl<sub>3</sub>): δ 7.38 (s, 5H), 3.81–3.35 (m, 8H); <sup>13</sup>C NMR (101 MHz, CDCl<sub>3</sub>): δ 170.4, 135.3, 129.9, 128.6, 127.1, 66.9, 48.2, 42.6.

### 1-benzoyl-4-methylpiperazine(3f)<sup>[5]</sup>

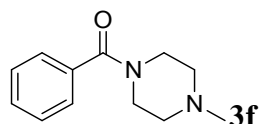

Oil. Yield: 90%. <sup>1</sup>H NMR (300 MHz, CDCl<sub>3</sub>): δ 7.40 (s, 5H), 3.81 (s, 2H), 3.45 (s, 2H), 2.17–2.63 (m, 7H); <sup>13</sup>C NMR (101 MHz, CDCl<sub>3</sub>): δ 170.2, 135.7, 129.6, 128.4, 127.0, 55.2, 54.7, 47.6, 46.0, 42.0.

### N,N-diethylbenzamide (3g)<sup>[6]</sup>

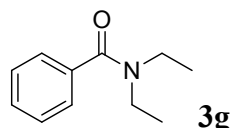

Oil. Yield: 84%. <sup>1</sup>H NMR (300 MHz, CDCl<sub>3</sub>): δ 7.35 (s, 5H), 3.53 (d, *J* = 4.9 Hz, 2H), 3.23 (d, *J* = 4.5 Hz, 2H), 1.24 (s, 3H), 1.09 (s, 3H); <sup>13</sup>C NMR (101 MHz, CDCl<sub>3</sub>): δ 171.3, 137.3, 129.1, 128.4, 126.2, 43.3, 39.2, 14.2, 12.9.

### N-benzylbenzamide (3h)<sup>[7]</sup>

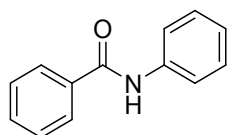

**3h**

White solid. Mp161-163°C (lit.<sup>7</sup> 162–163 °C). Yield: 91%. <sup>1</sup>H NMR (300 MHz, CDCl<sub>3</sub>): δ 7.86 (d, *J* = 7.1 Hz, 3H), 7.64 (d, *J* = 7.9 Hz, 2H), 7.42–7.59 (m, 3H), 7.37 (t, *J* = 7.8 Hz, 2H), 7.15 (t, *J* = 7.4 Hz, 1H); <sup>13</sup>C NMR (101 MHz, CDCl<sub>3</sub>): δ 165.8, 137.9, 135.0, 131.9, 129.1, 128.8, 127.0, 124.6, 120.2.

**N-(*p*-tolyl)benzamide (3i)<sup>[7]</sup>**

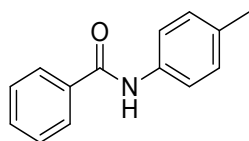

**3i**

White solid. Mp154-157°C (lit.<sup>7</sup> 154–157 °C). Yield: 82%. <sup>1</sup>H NMR (300 MHz, CDCl<sub>3</sub>): δ 7.85 (d, *J* = 7.6 Hz, 2H), 7.80 (s, 1H), 7.44–7.56 (m, 4H), 7.17 (d, *J* = 7.3 Hz, 2H), 3.48 (s, 1H), 2.35 (s, 3H); <sup>13</sup>C NMR (101 MHz, CDCl<sub>3</sub>): δ 165.8, 135.4, 135.1, 134.2, 131.7, 129.6, 128.7, 127.1, 120.4, 21.0.

**N-(4-chlorophenyl)benzamide (3j)<sup>[7]</sup>**

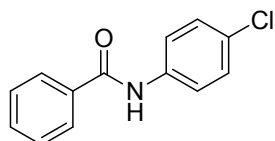

**3j**

White solid. Mp147-152°C (lit.<sup>7</sup> 193–194 °C). Yield: 53%. <sup>1</sup>H NMR (400 MHz, CDCl<sub>3</sub>): δ 7.90 (d, *J* = 7.9 Hz, 2H), 7.85 (s, 1H), 7.57–7.68 (m, 3H), 7.54 (t, *J* = 7.6 Hz, 2H), 7.38 (d, *J* = 8.5 Hz, 2H); <sup>13</sup>C NMR (101 MHz, DMSO): δ 166.1, 138.7, 135.2, 132.2, 129.0, 128.9, 128.2, 127.7, 122.3.

**N-(4-methoxyphenyl)benzamide(3k)<sup>[8]</sup>**

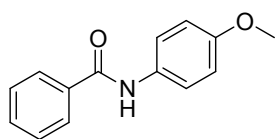

**3k**

White solid. Mp154–156°C (lit.<sup>8</sup> 154–155 °C). Yield: 67%. <sup>1</sup>H NMR (300 MHz, CDCl<sub>3</sub>): δ 7.84 (d, *J* = 6.9 Hz, 3H), 7.61–7.39 (m, 5H), 6.89 (d, *J* = 8.8 Hz, 2H), 3.81 (s, 3H); <sup>13</sup>C NMR (101 MHz, CD<sub>3</sub>OD): δ 167.3, 156.9, 134.9, 131.4, 131.3, 128.2, 127.1, 122.7, 113.5, 54.5.

**N-methoxyl-N-methylbenzamide (3l)<sup>[3]</sup>**

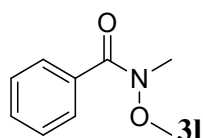

Oil. Yield: 75%.  $^1\text{H}$  NMR (300 MHz,  $\text{CDCl}_3$ ):  $\delta$  7.65 (d,  $J = 7.1$  Hz, 2H), 7.48–7.31 (m, 3H), 3.55 (s, 3H), 3.36 (s, 3H);  $^{13}\text{C}$  NMR (101 MHz,  $\text{CDCl}_3$ ):  $\delta$  167.0, 134.1, 130.6, 128.1, 128.0, 61.0, 33.8.

### N-butyl-3-phenylpropanamide (3m)<sup>[9]</sup>

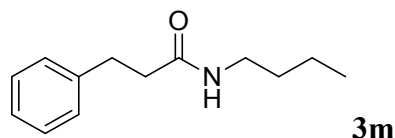

Oil. Yield: 65%.  $^1\text{H}$  NMR (400 MHz,  $\text{CDCl}_3$ ):  $\delta$  7.32–7.25 (m, 2H), 7.23–7.17 (m, 3H), 5.78 (s, 1H), 3.21 (td,  $J = 7.1, 5.9$  Hz, 2H), 2.97 (t,  $J = 8.0$  Hz, 2H), 2.47 (t,  $J = 7.5$  Hz, 2H), 1.47–1.36 (m, 2H), 1.32–1.21 (m, 2H), 0.90 (t,  $J = 7.3$  Hz, 3H);  $^{13}\text{C}$  NMR (101 MHz,  $\text{CDCl}_3$ ):  $\delta$  172.2, 140.9, 128.5, 128.3, 126.2, 39.2, 38.5, 31.9, 31.6, 20.0, 13.8.

### N-(4-chlorophenyl)-3-phenylpropanamide (3n)<sup>[10]</sup>

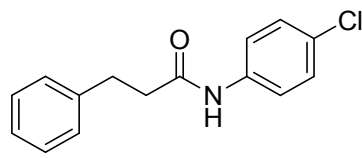

White solid. Mp 158–159°C (lit.<sup>10</sup> 141.5–143 °C). Yield: 80%.  $^1\text{H}$  NMR (400 MHz,  $\text{CDCl}_3$ ):  $\delta$  7.57 (s, 1H), 7.40 (d,  $J = 8.8$  Hz, 2H), 7.35–7.28 (m, 2H), 7.21–7.27 (m, 5H), 3.04 (t,  $J = 7.6$  Hz, 2H), 2.67 (t,  $J = 7.6$  Hz, 2H);  $^{13}\text{C}$  NMR (101 MHz,  $\text{CDCl}_3$ ):  $\delta$  170.8, 140.4, 136.3, 129.3, 129.0, 128.7, 128.4, 126.5, 121.4, 39.3, 31.5.

### N,N-diethyl-3-phenylpropanamide (3o)<sup>[11]</sup>

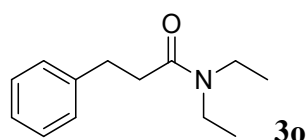

Oil. Yield: 67%.  $^1\text{H}$  NMR (400 MHz,  $\text{CDCl}_3$ ):  $\delta$  7.35–7.16 (m, 5H), 3.39 (q,  $J = 7.1$  Hz, 2H), 3.23 (q,  $J = 7.1$  Hz, 2H), 3.00 (t,  $J = 8.2$  Hz, 2H), 2.61 (t,  $J = 7.6$  Hz, 2H), 1.18–1.03 (m, 6H);  $^{13}\text{C}$  NMR (101 MHz,  $\text{CDCl}_3$ ):  $\delta$  171.3, 141.6, 128.5, 126.1, 41.9, 40.2, 35.1, 31.7, 14.3, 13.1.

### N-methoxy-N-methyl-3-phenylpropanamide (3p)<sup>[12]</sup>

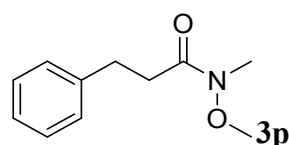

Oil. Yield: 86%.  $^1\text{H}$  NMR (400 MHz,  $\text{CDCl}_3$ ):  $\delta$  7.34–7.18 (m, 5H), 3.60 (s, 3H), 3.19 (s, 3H), 2.98 (t,  $J = 8.3$  Hz, 2H), 2.76 (t,  $J = 7.6$  Hz, 2H);  $^{13}\text{C}$  NMR (101 MHz,  $\text{CDCl}_3$ ):  $\delta$  173.7, 141.34, 128.5, 128.4, 126.1, 61.2, 33.8, 32.2, 30.7.

### N-Cbz-Phe benzylamide (3q)<sup>[13]</sup>

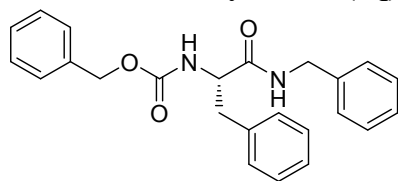

White Solid. Mp 160–162°C [lit.<sup>13</sup> mp 162–164°C]. Yield: 85%. <sup>1</sup>H NMR (400 MHz, CDCl<sub>3</sub>): δ 7.41–7.13 (m, 13H), 7.12–7.03 (m, 2H), 6.18 (s, 1H), 5.48 (d, *J* = 5.4 Hz, 1H), 5.12–4.98 (s, 2H), 4.47 (d, *J* = 6.7 Hz, 1H), 4.41–4.28 (m, 2H), 3.21–3.01 (m, 2H); <sup>13</sup>C NMR (101 MHz, CDCl<sub>3</sub>): δ 170.7, 155.9, 137.5, 136.4, 136.1, 129.4, 128.7, 128.6, 128.6, 128.2, 128.0, 127.7, 127.5, 127.0, 67.1, 56.5, 43.5, 38.8.

### N-Cbz-L-Phe-L-Phe-OMe (3r)<sup>[14]</sup>

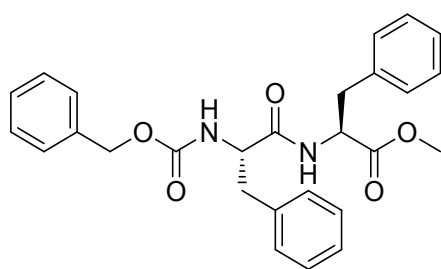

**3r**

White solid. Mp 146–147°C (lit.<sup>14</sup> 134–136 °C). Yield: 90%. <sup>1</sup>H NMR (400 MHz, CDCl<sub>3</sub>): δ 7.42–7.18 (m, 13H), 7.03–6.94 (m, 2H), 6.20 (d, *J* = 7.5 Hz, 1H), 5.24 (d, *J* = 7.2 Hz, 1H), 5.11 (s, 2H), 4.80 (dt, *J* = 7.5, 5.9 Hz, 1H), 4.42 (dd, *J* = 14.1, 6.9 Hz, 1H), 3.70 (s, 3H), 3.14–2.99 (m, 4H); <sup>13</sup>C NMR (101 MHz, CDCl<sub>3</sub>): δ 171.3, 170.4, 155.9, 136.2, 136.1, 135.5, 129.4, 129.2, 128.7, 128.6, 128.2, 128.0, 127.2, 127.1, 67.1, 56.0, 53.3, 52.4, 38.3, 37.9.

### Referencee

- [1] B. Sharif, J. L. Gong, P. Langer, M. Beller and X. F. Wu, *Chem. Commun.*, 2014, **50**, 4747–4750.
- [2] G. Wang, G. Yu, J. Wang, S. Wang, S. Y. Chen and X. Q. Yu. *RSC Adv.*, 2013, **3**, 21306–21311.
- [3] D. Glynn, D. Bernier and S. Woodward, *Tetrahedron Lett.*, 2008, **49**, 5687–5688.
- [4] M. Pilo, A. Porcheddu and L. D. Luca, *Org. Biomol. Chem.*, 2013, **11**, 8241–8247.
- [5] M. W. Zhu, K. Fujita and R. Yamaguchi, *J. Org. Chem.*, 2012, **77**, 9102–9109.
- [6] A. Kumar, H. K. Akula and M. K. Lakshman, *Eur. J. Org. Chem.*, 2010, 2709–2715.
- [7] H. W. Heine, R. Zibuck and W. J. A. VandenHeuvel, *J. Am. Chem. Soc.*, 1982, **104**, 3691–3694.
- [8] P. J. Tambade, Y. P. Patil, M. J. Bhanushali and B. M. Bhanage, *Synthesis*, 2008, 2347–2352.
- [9] H. Chen, X. Xu, L. Liu, G. Tang and Y. Zhao, *RSC Adv.*, 2013, **3**, 16247–16250.
- [10] K. Hioki, S. Kameyama, S. Tani and M. Kunishima, *Chem. Pharm. Bull.*, 2007, **55**, 825–828.
- [11] J. F. Bai, B. K. Zambroń and P. Vogel, *Org. Lett.*, 2014, **16**, 604–607.
- [12] H. Toledo, E. Pisarevsky, A. Abramovich and A. M. Szpilman, *Chem. Commun.*, 2013, **49**, 4367–4370.
- [13] Y. Saito, H. Ouchi and H. Takahata, *Tetrahedron*, 2008, **64**, 11129–11135.
- [14] R. R. Hill, D. Birch, G. E. Jeffs and M. North, *Org. Biomol. Chem.*, 2003, **1**, 965–972.

### <sup>1</sup>H NMR (400 MHz, CDCl<sub>3</sub>) of 3a

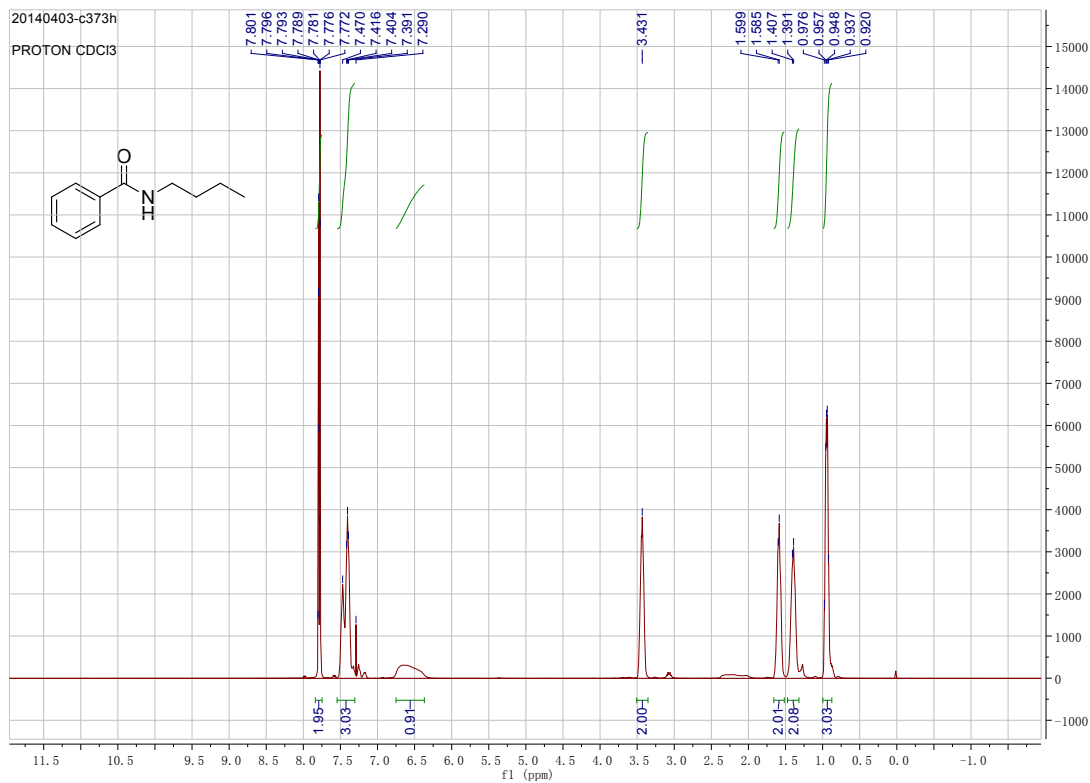

### <sup>13</sup>C NMR (101 MHz, CDCl<sub>3</sub>) of 3a

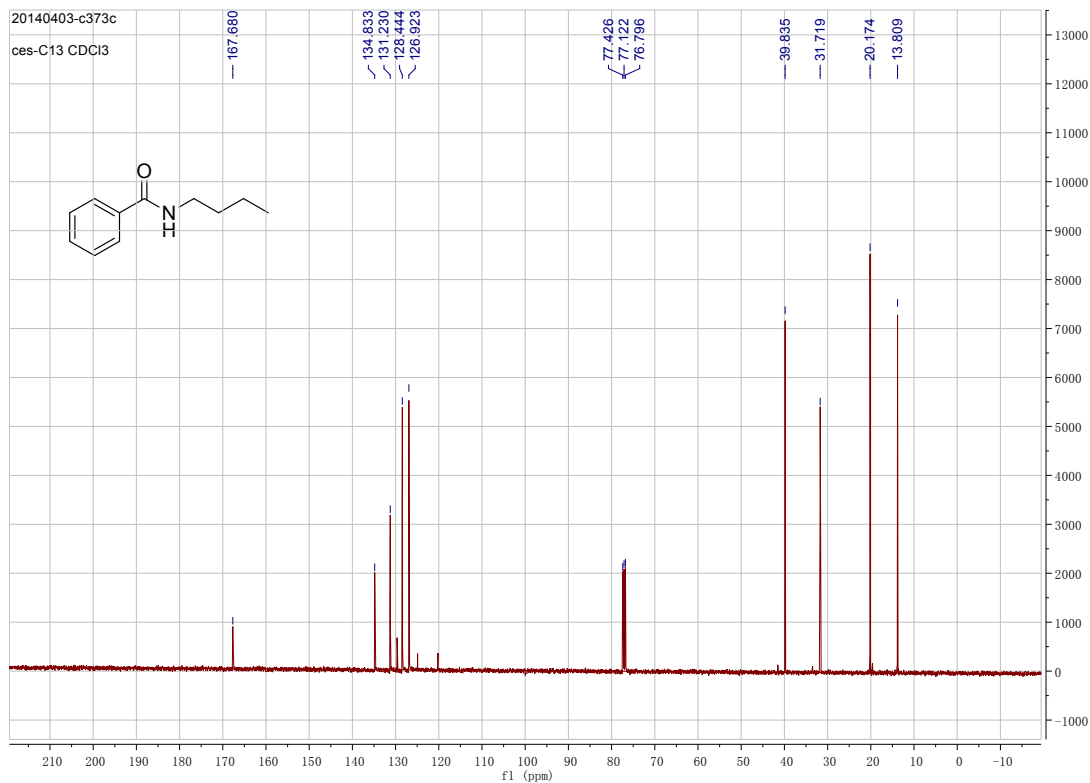

### <sup>1</sup>H NMR (400 MHz, CDCl<sub>3</sub>) of **3b**

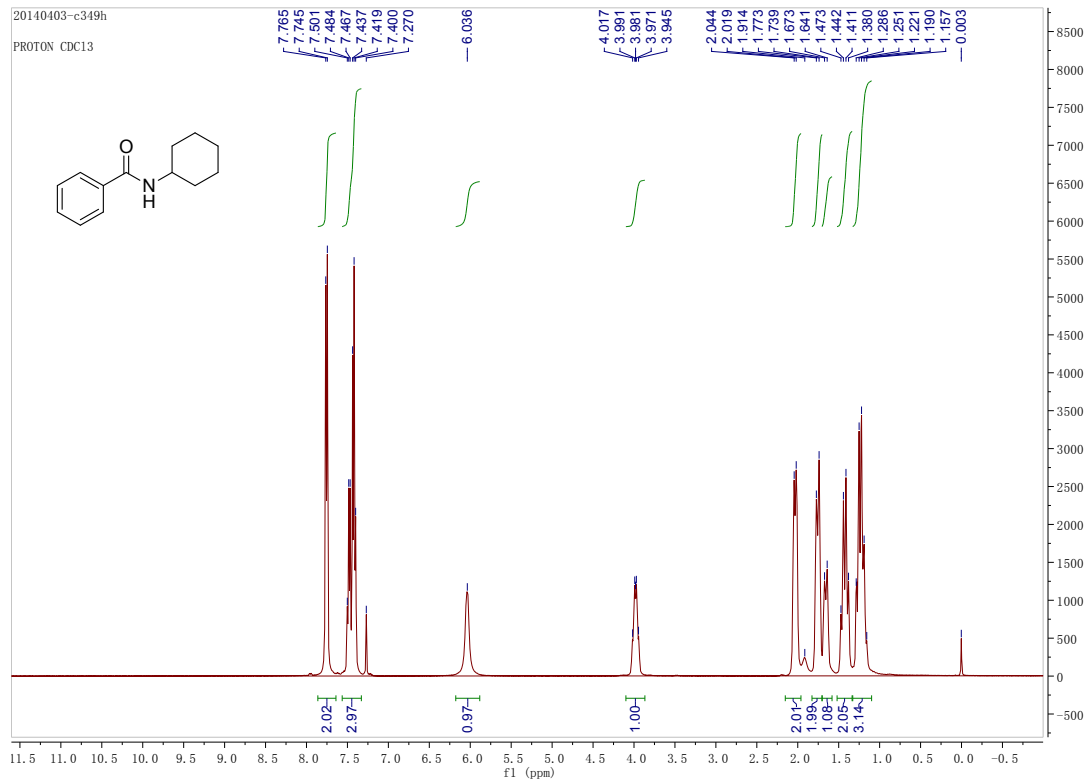

### <sup>13</sup>C NMR (101 MHz, CDCl<sub>3</sub>) of **3b**

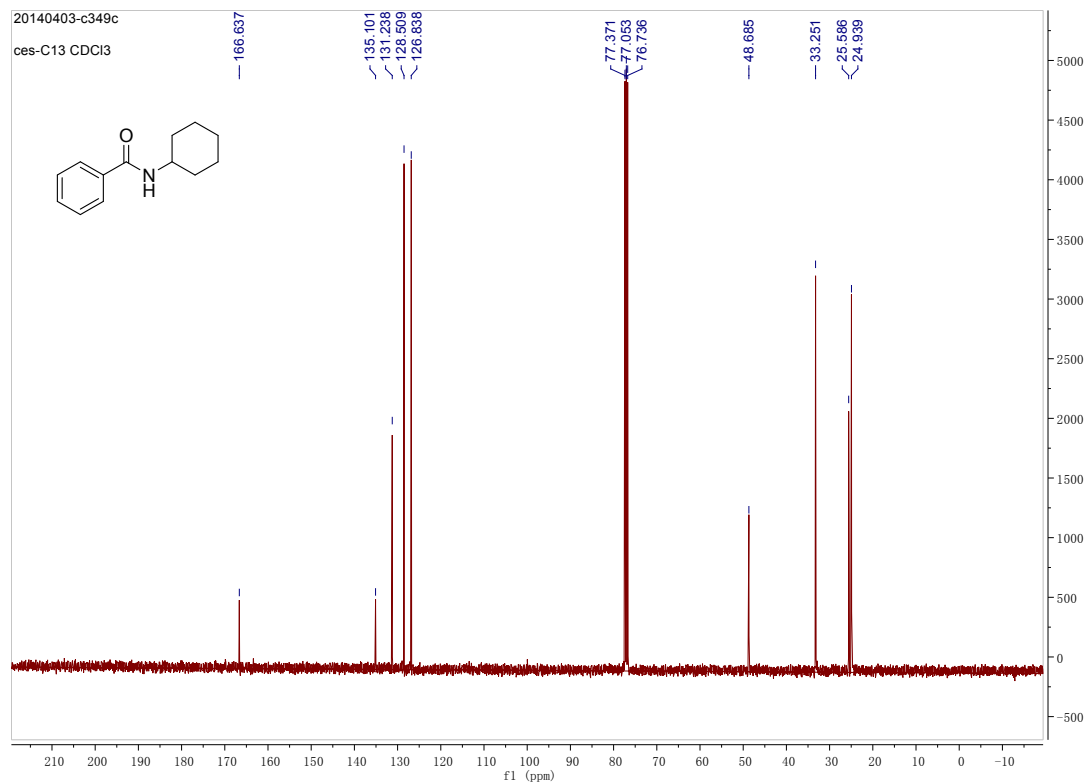



<sup>1</sup>H NMR (400 MHz, CDCl<sub>3</sub>) of **3c**

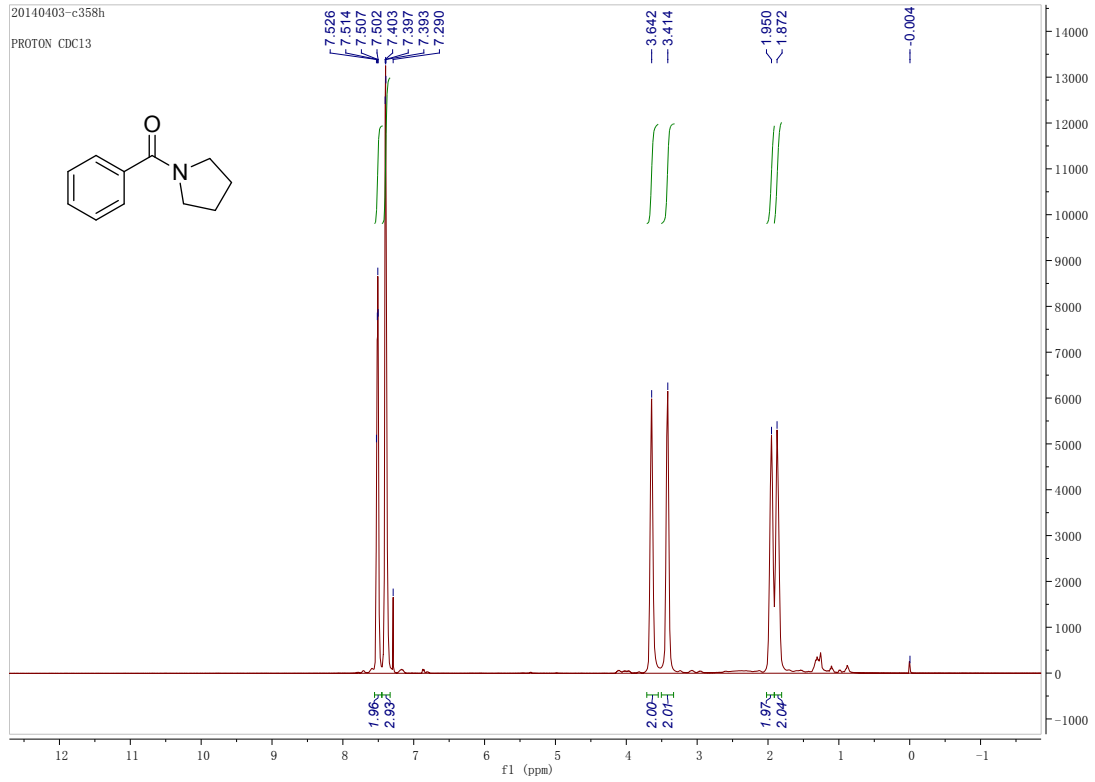

<sup>13</sup>C NMR (101 MHz, CDCl<sub>3</sub>) of **3c**

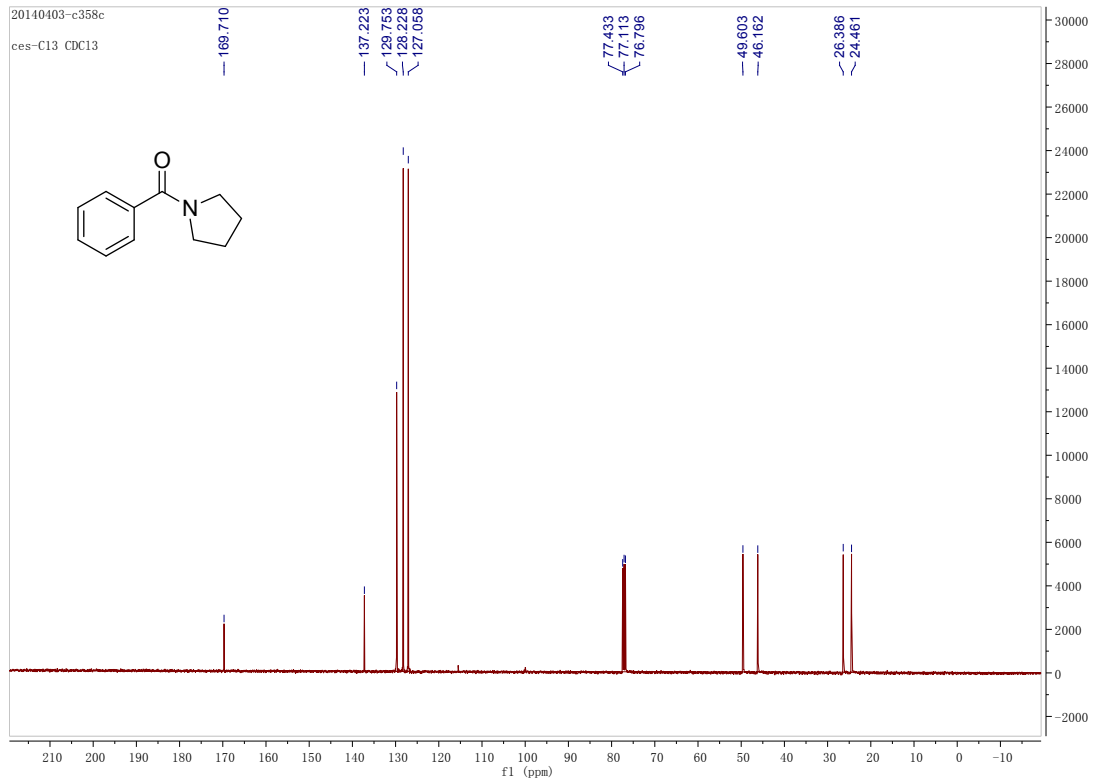

<sup>1</sup>H NMR (300 MHz, CDCl<sub>3</sub>) of **3d**

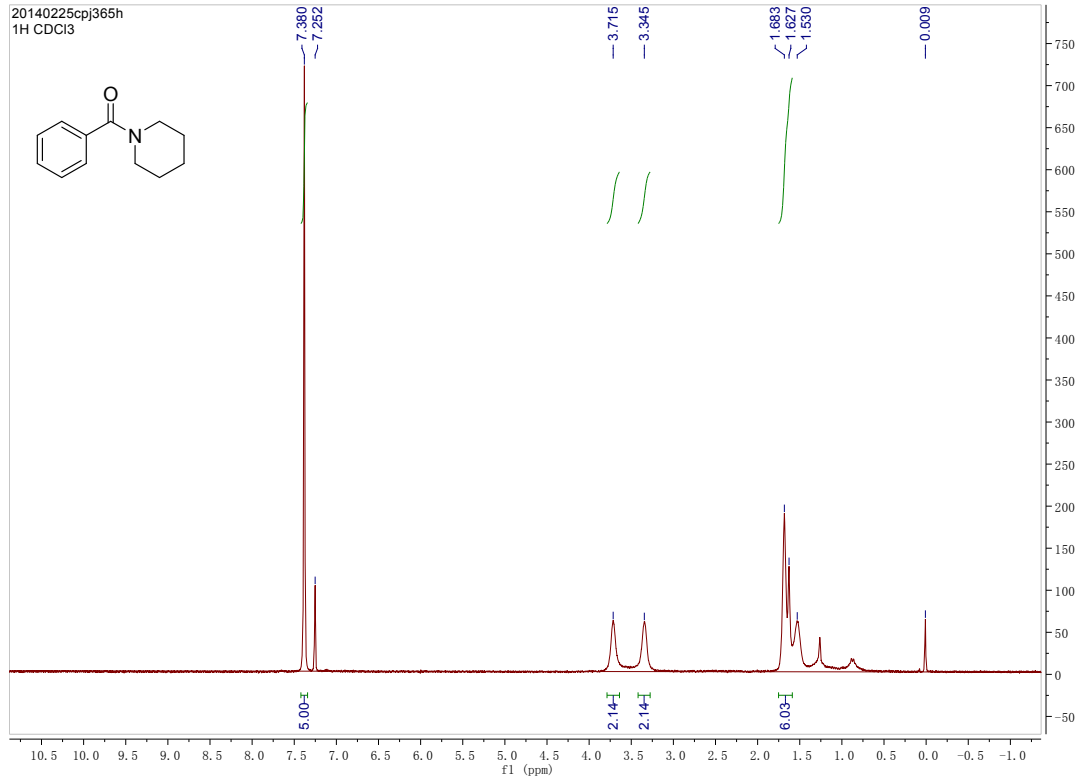

<sup>13</sup>C NMR (101 MHz, CDCl<sub>3</sub>) of **3d**

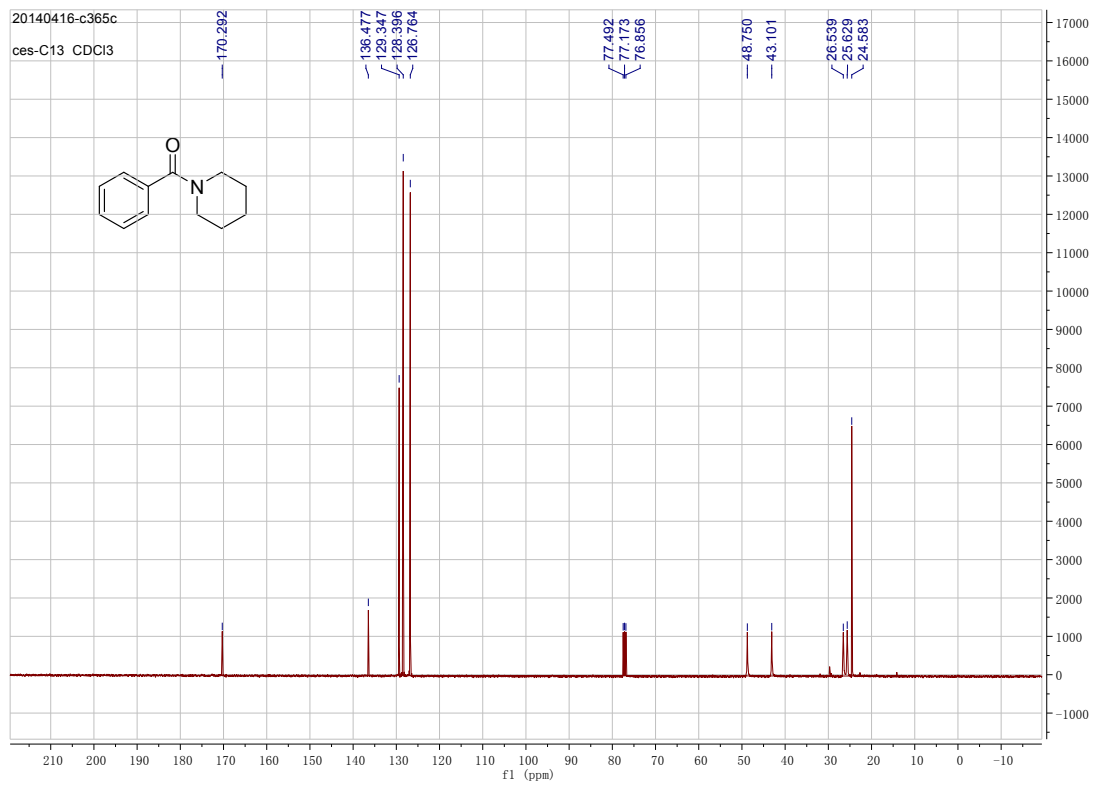

<sup>1</sup>H NMR (300 MHz, CDCl<sub>3</sub>) of **3e**

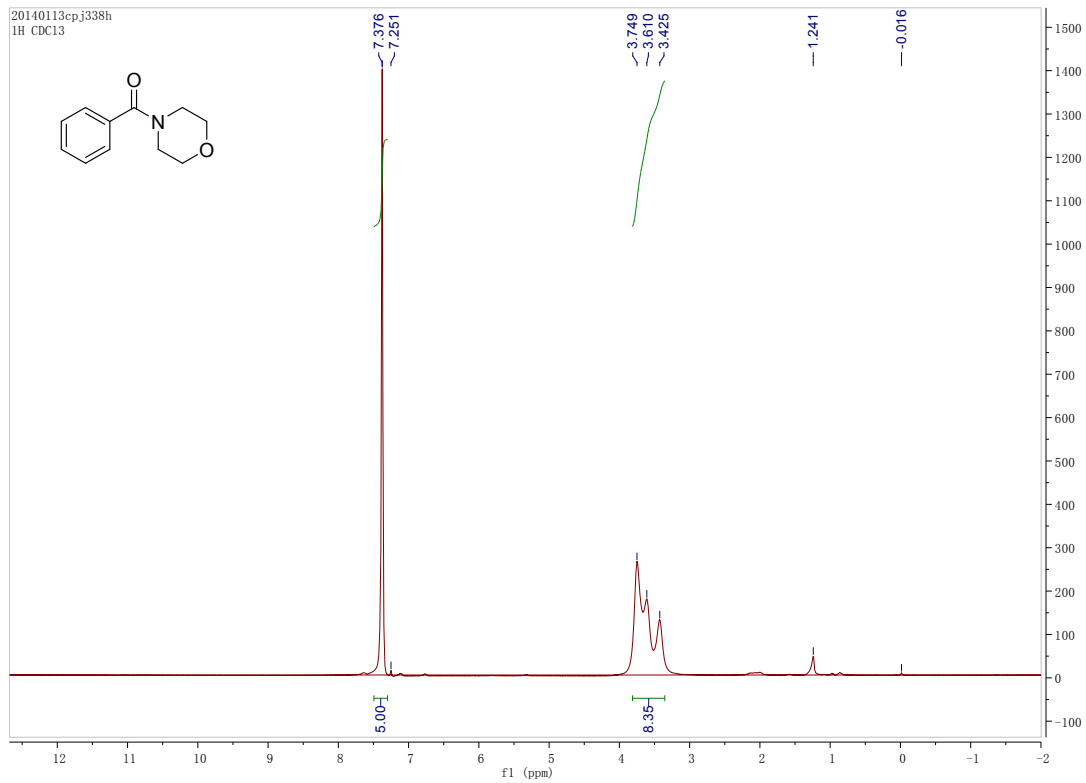

<sup>13</sup>C NMR (101 MHz, CDCl<sub>3</sub>) of **3e**

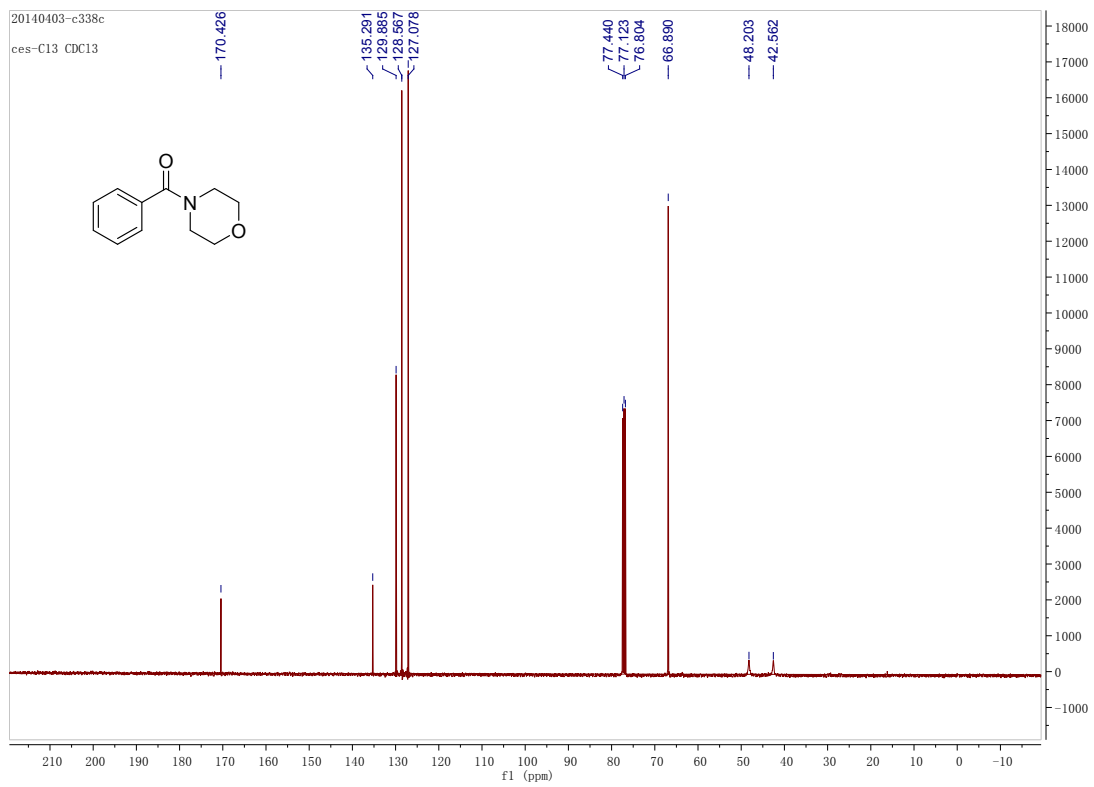

### <sup>1</sup>H NMR (300 MHz, CDCl<sub>3</sub>) of **3f**

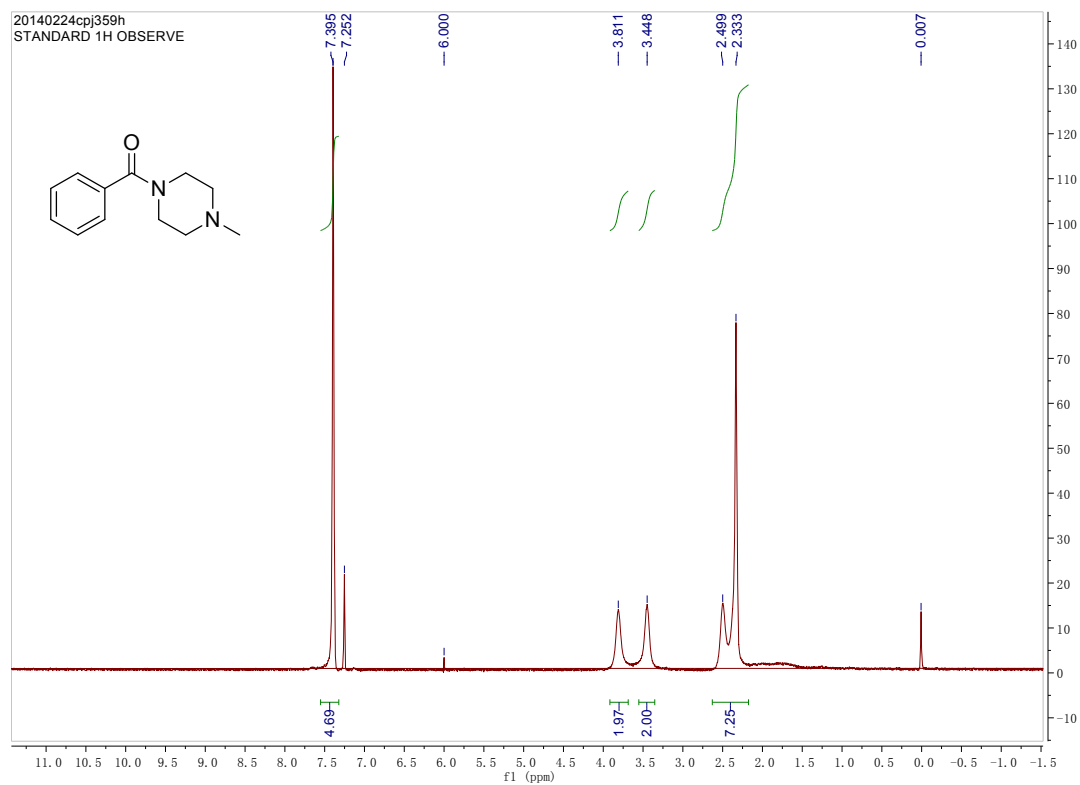

### <sup>13</sup>C NMR (101 MHz, CDCl<sub>3</sub>) of **3f**

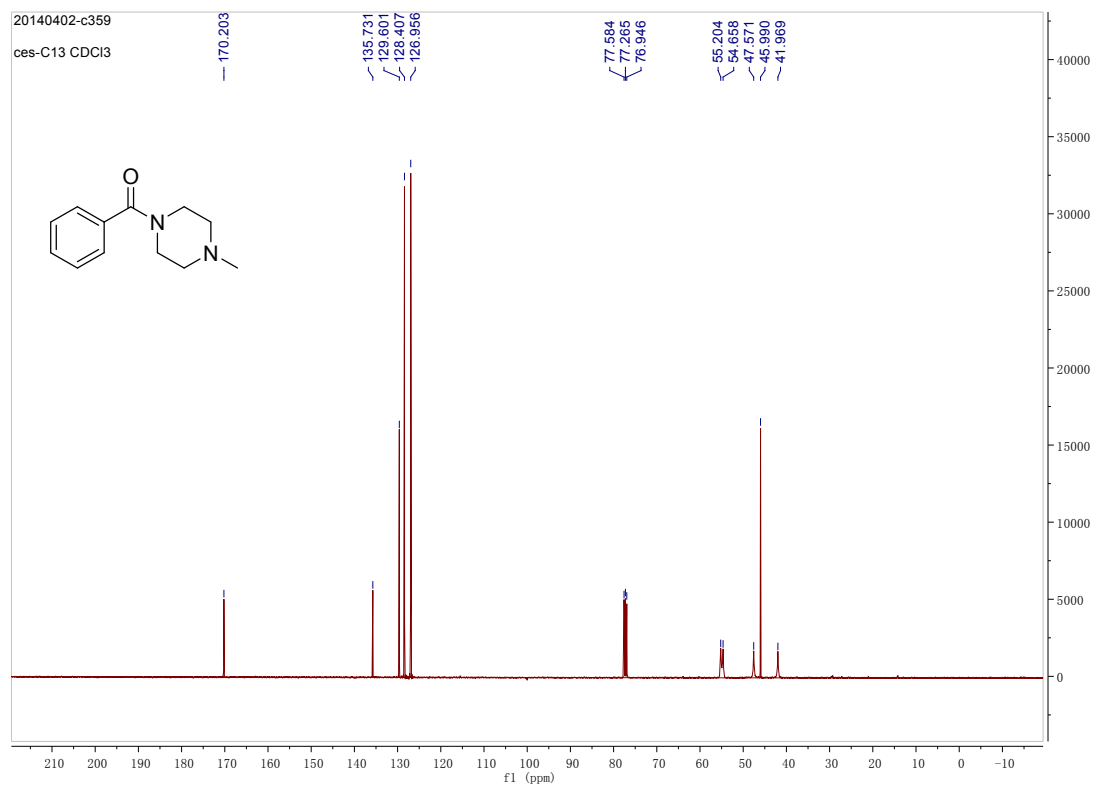

<sup>1</sup>H NMR (300 MHz, CDCl<sub>3</sub>) of **3g**

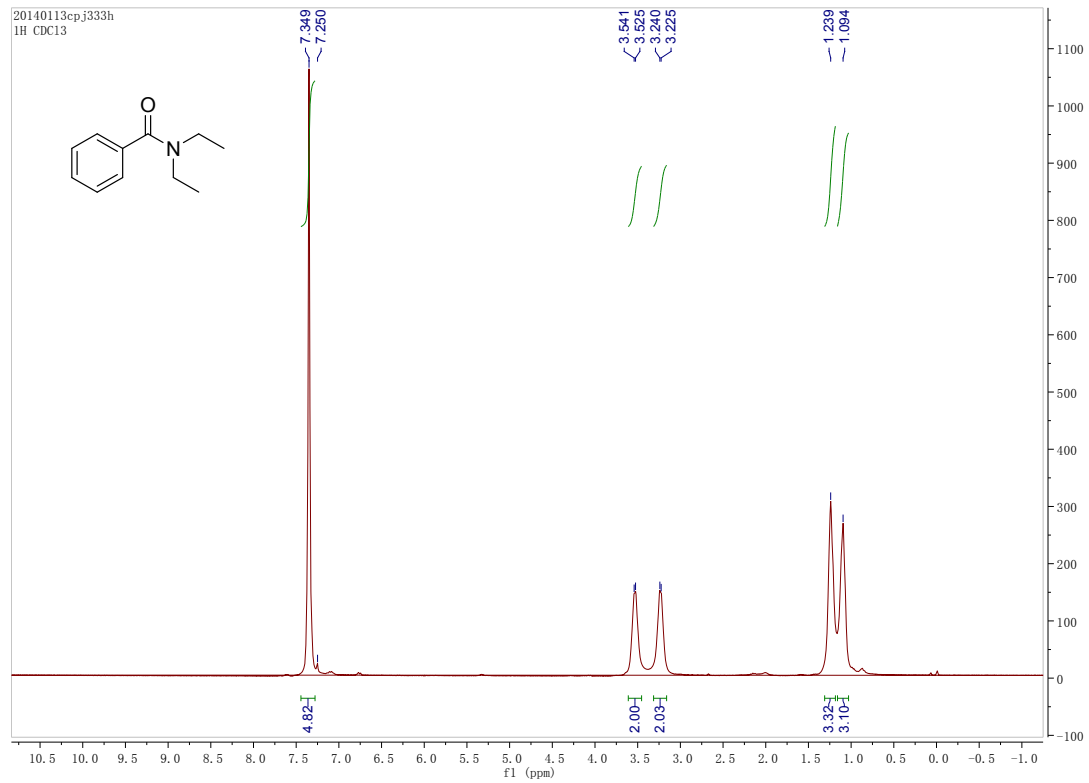

<sup>13</sup>C NMR (101 MHz, CDCl<sub>3</sub>) of **3g**

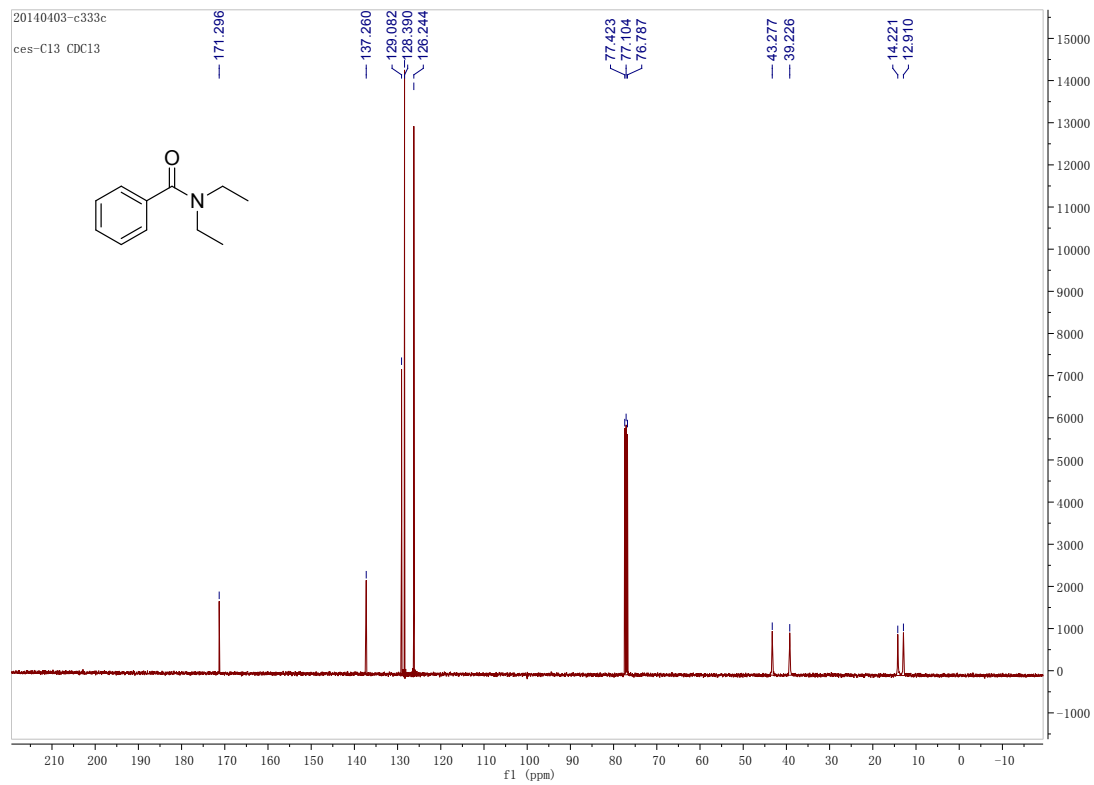

### <sup>1</sup>H NMR (300 MHz, CDCl<sub>3</sub>) of **3h**

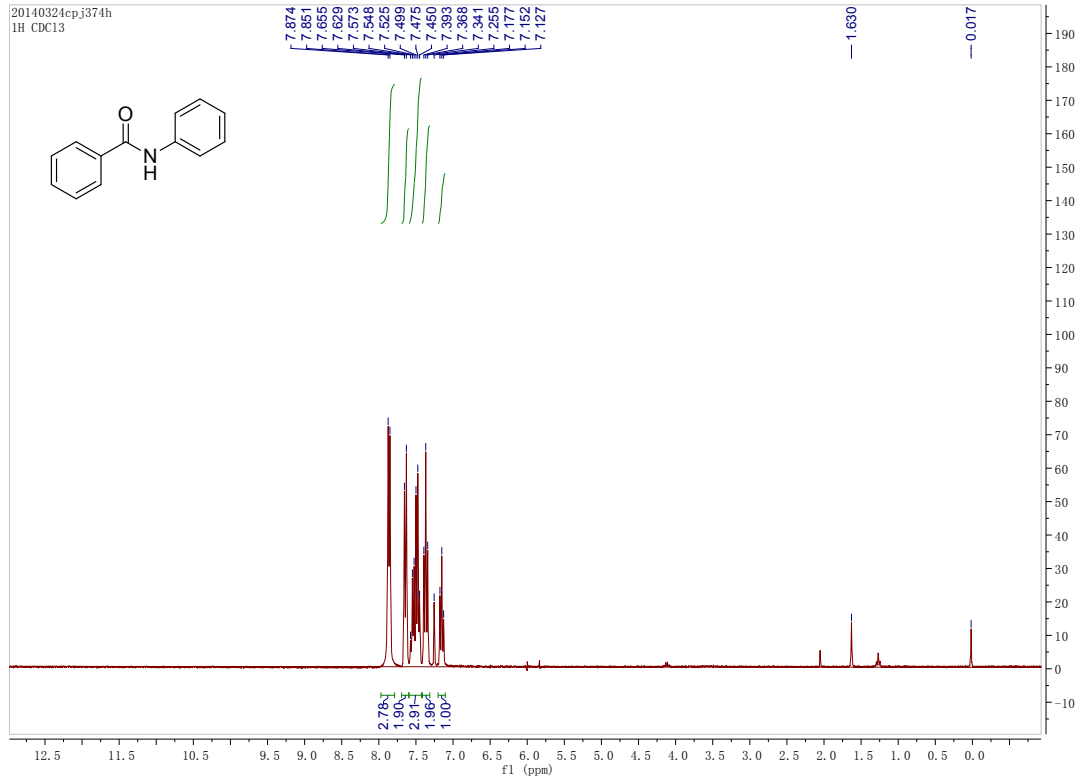

### <sup>13</sup>C NMR (101 MHz, CDCl<sub>3</sub>) of **3h**

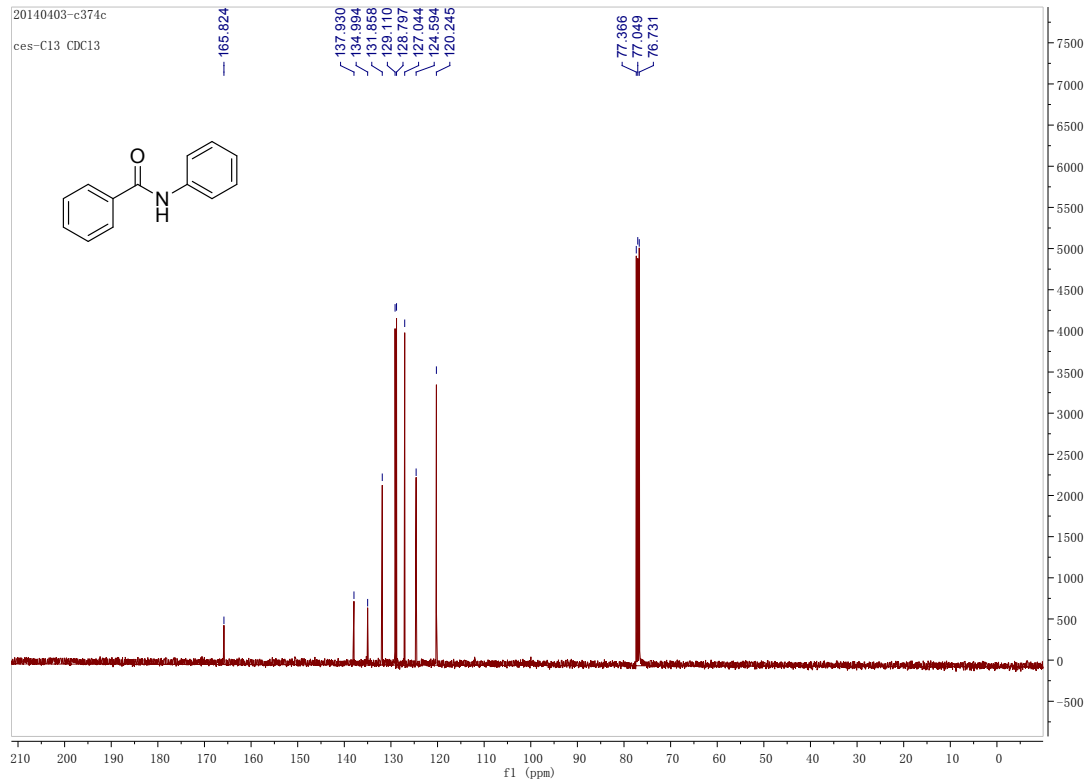

### <sup>1</sup>H NMR (300 MHz, CDCl<sub>3</sub>) of **3i**

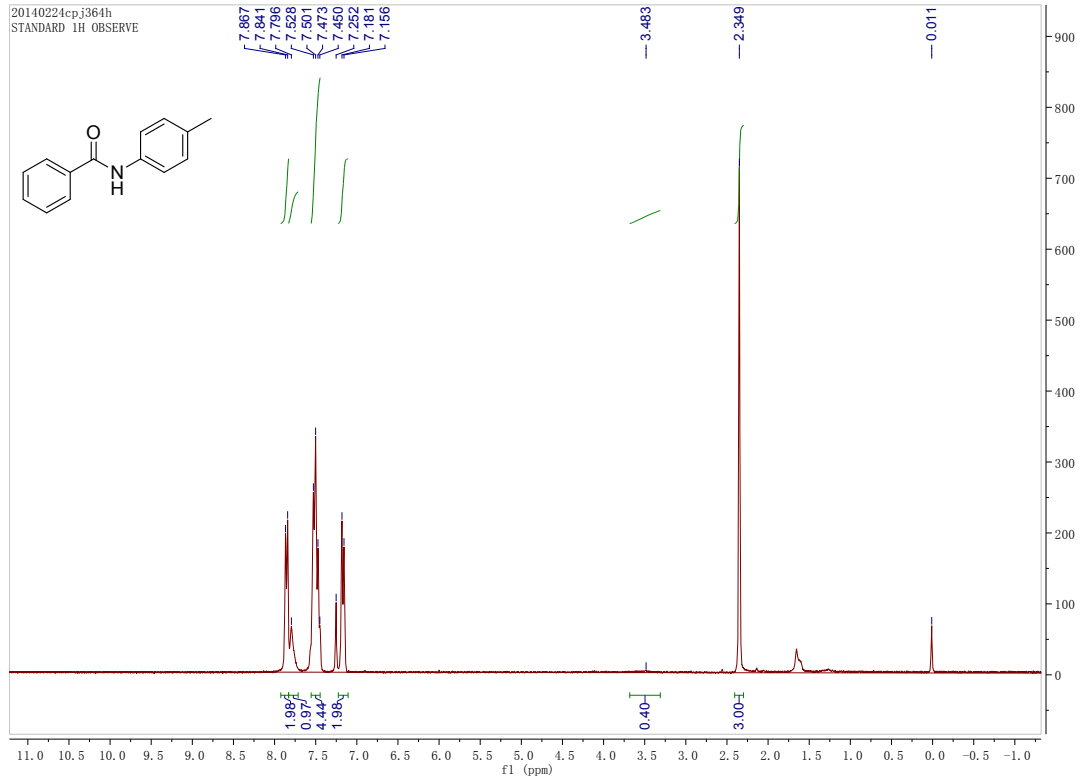

### <sup>13</sup>C NMR (101 MHz, CDCl<sub>3</sub>) of **3i**

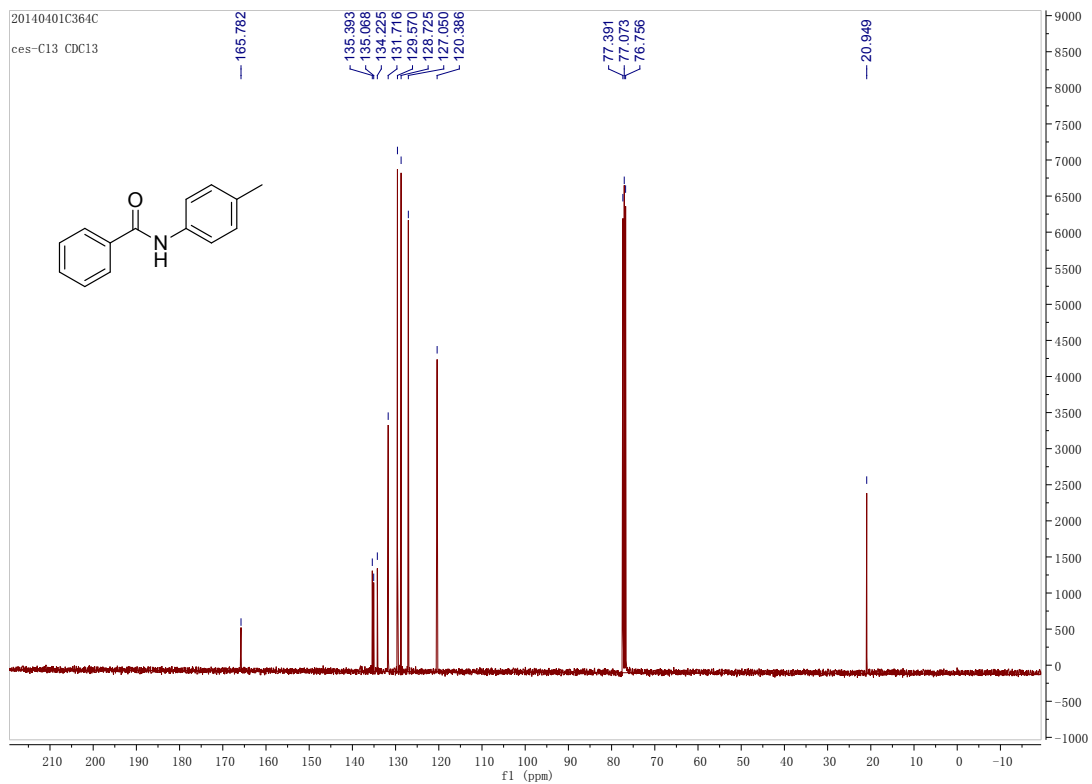

### <sup>1</sup>H NMR (400 MHz, CDCl<sub>3</sub>) of **3j**

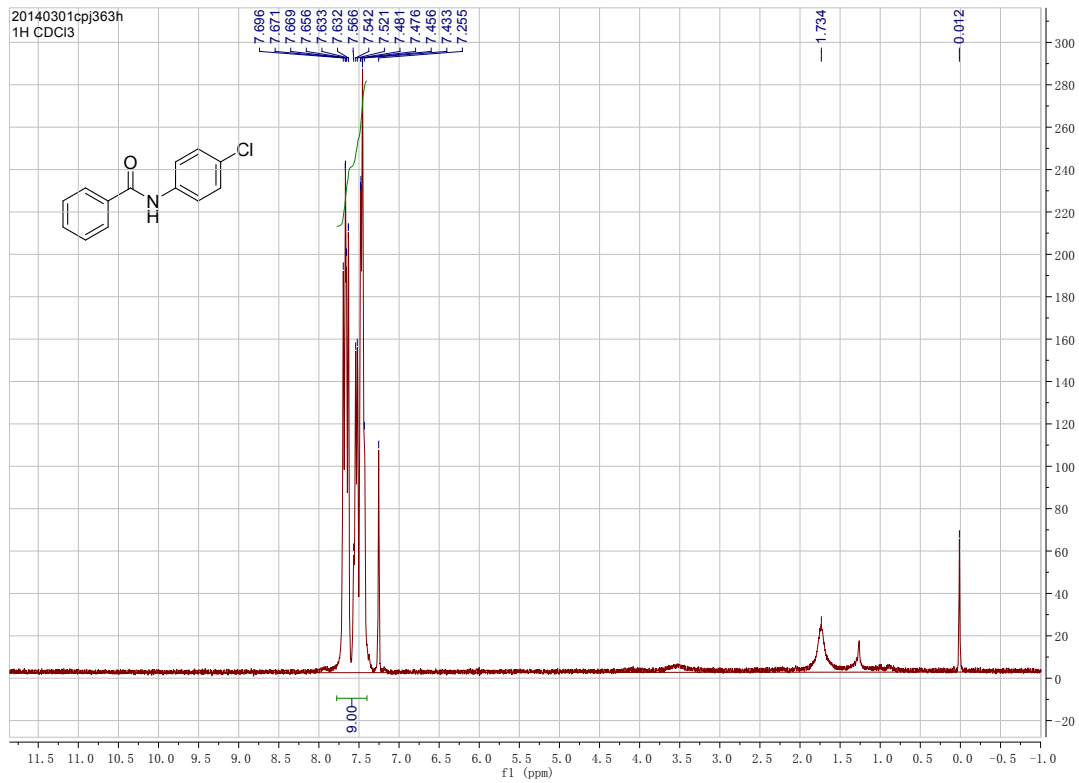

### <sup>13</sup>C NMR (101 MHz, DMSO) of **3j**

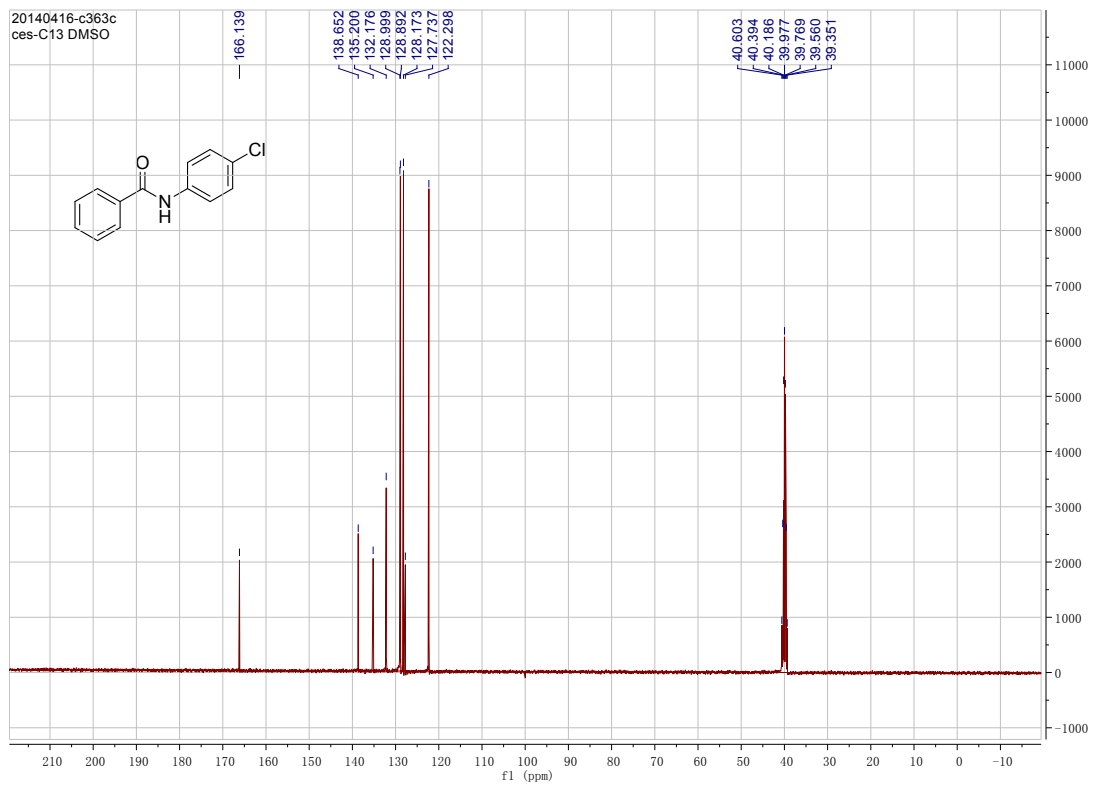



### <sup>1</sup>H NMR (300 MHz, CDCl<sub>3</sub>) of 3k

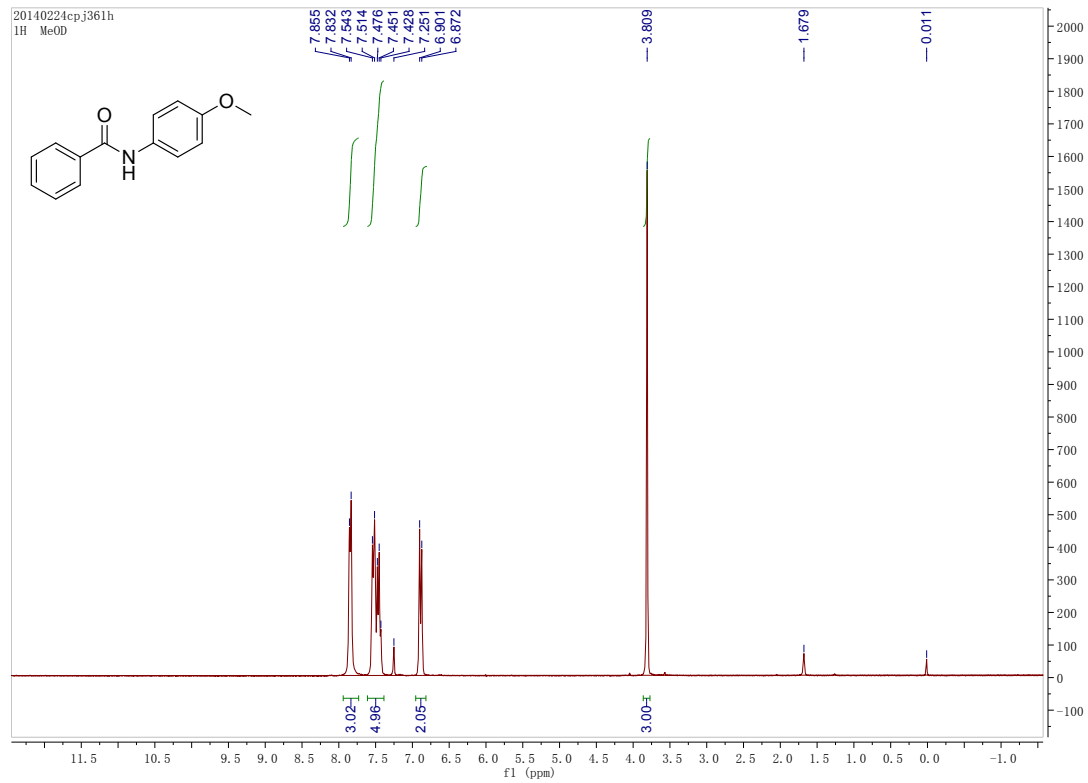

### <sup>13</sup>C NMR (101 MHz, CDCl<sub>3</sub>) of 3k

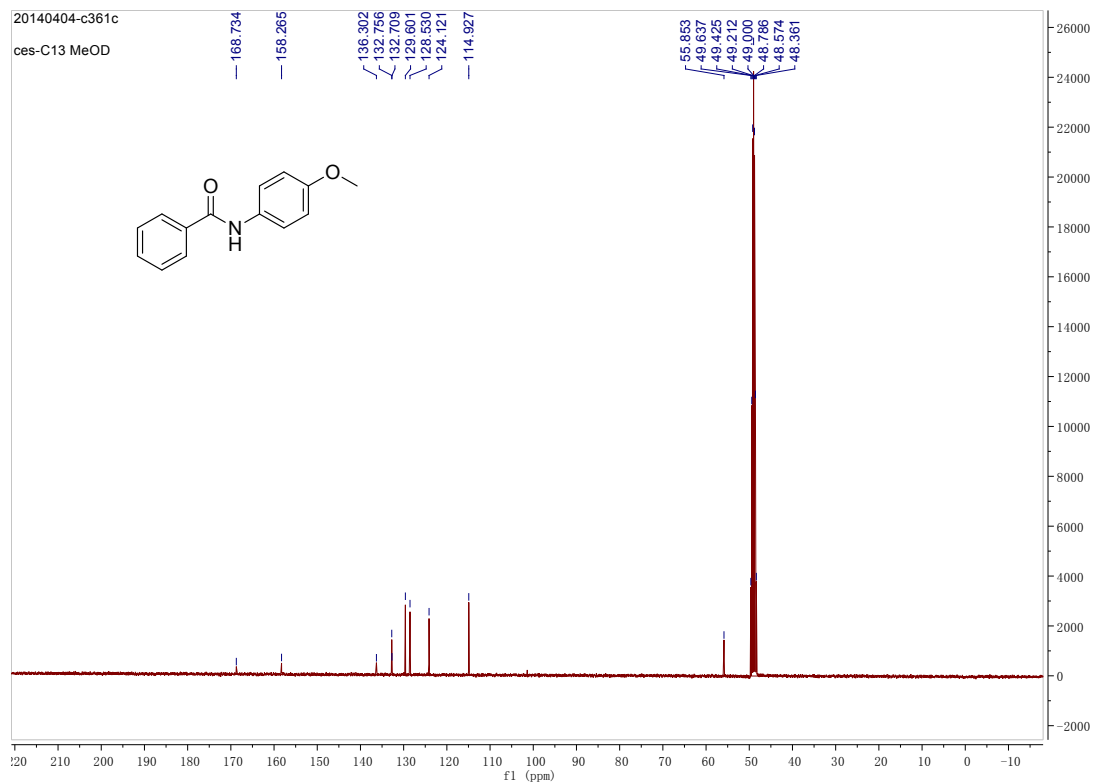

### <sup>1</sup>H NMR (300 MHz, CDCl<sub>3</sub>) of **3I**

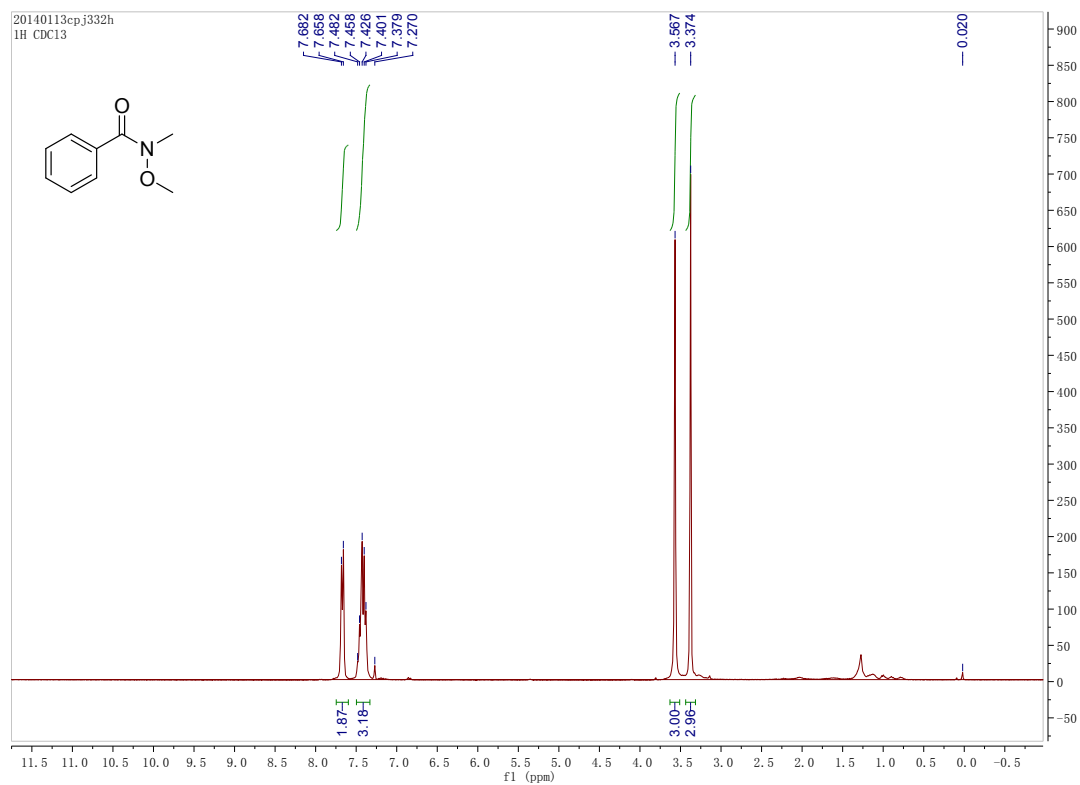

### <sup>13</sup>C NMR (101 MHz, CDCl<sub>3</sub>) of **3I**

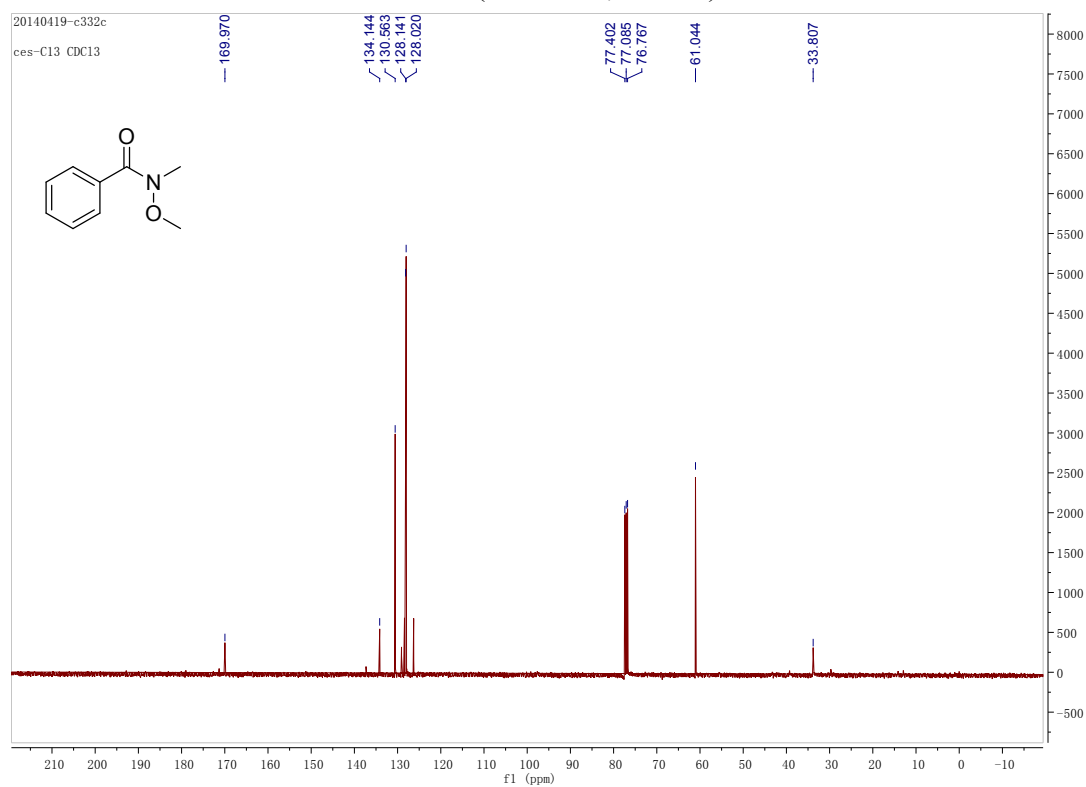

### <sup>1</sup>H NMR (400 MHz, CDCl<sub>3</sub>) of **3m**

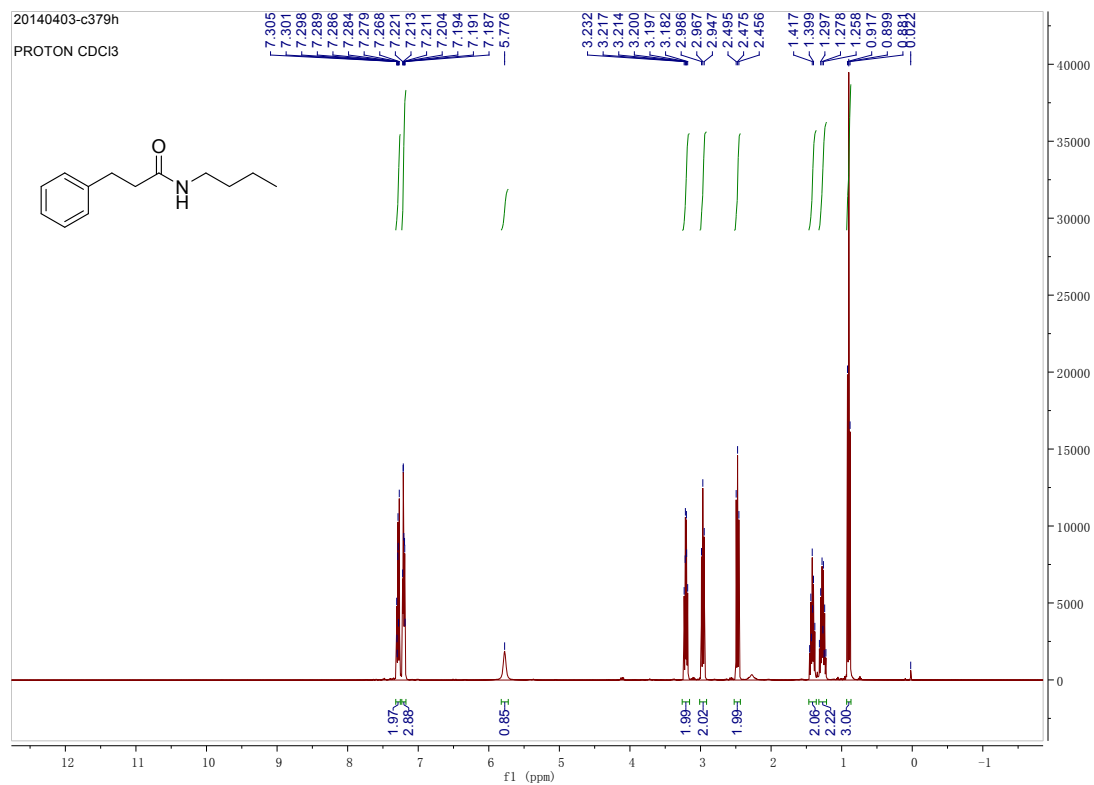

### <sup>13</sup>C NMR (101 MHz, CDCl<sub>3</sub>) of **3m**

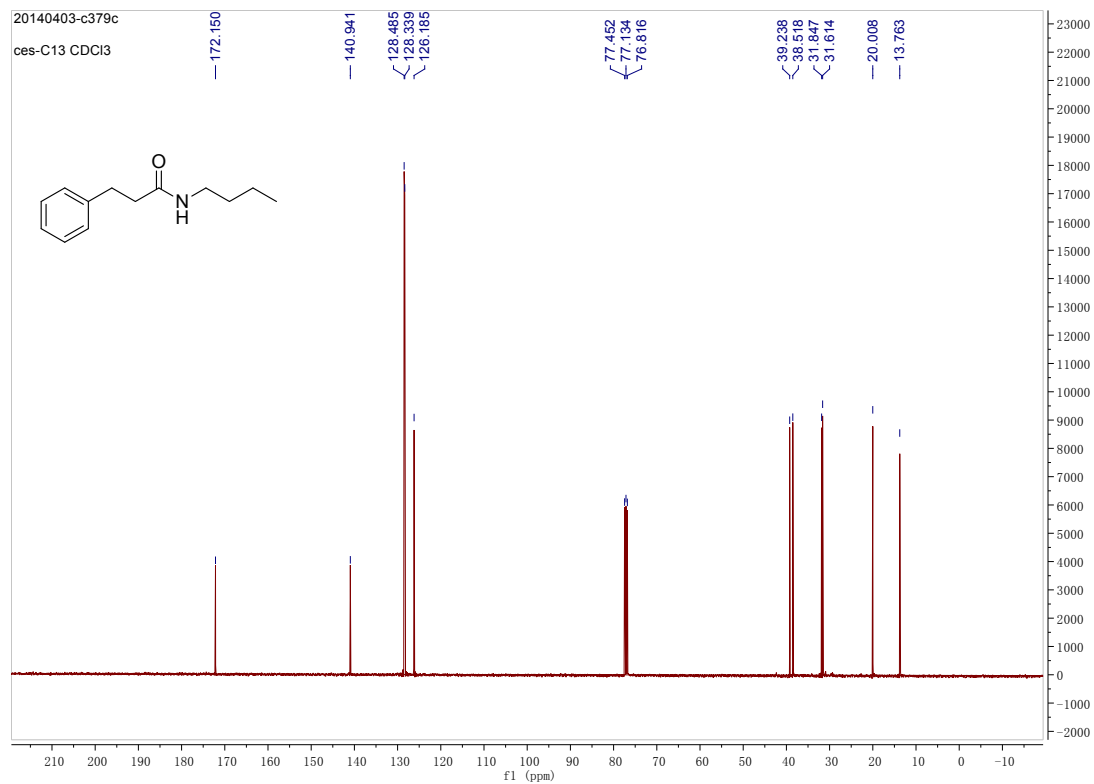

<sup>1</sup>H NMR (400 MHz, CDCl<sub>3</sub>) of **3n**

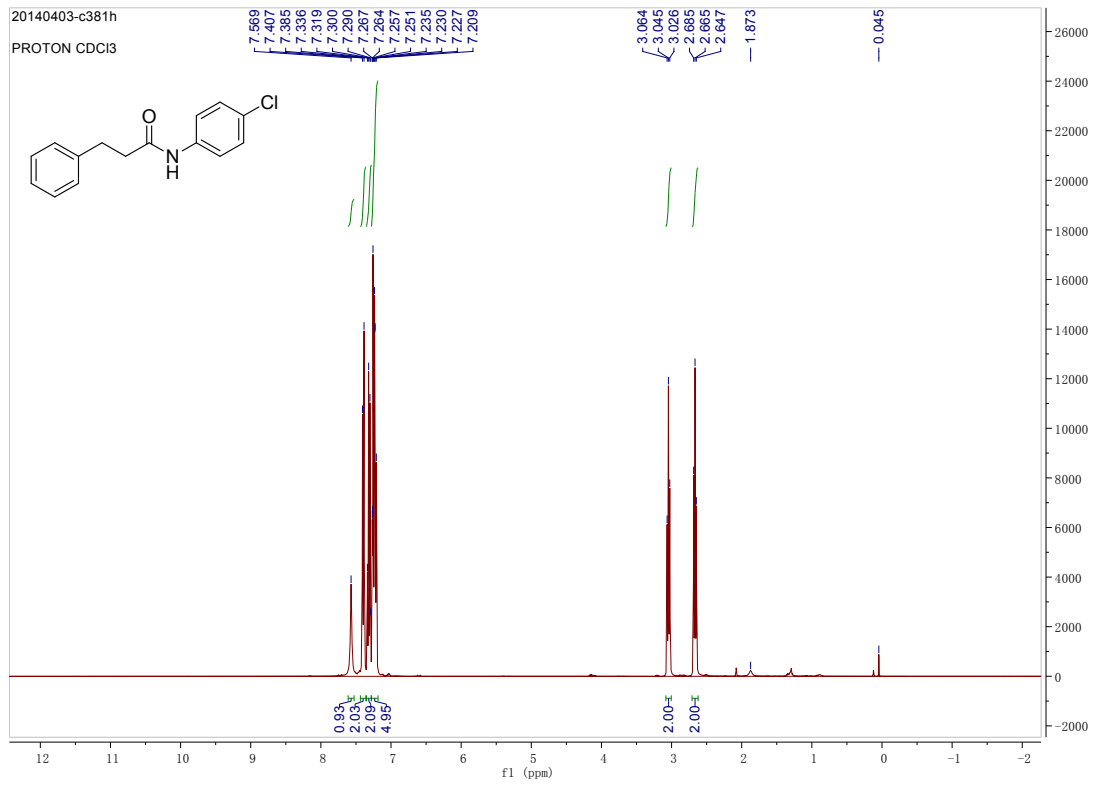

<sup>13</sup>C NMR (101 MHz, CDCl<sub>3</sub>) of **3n**

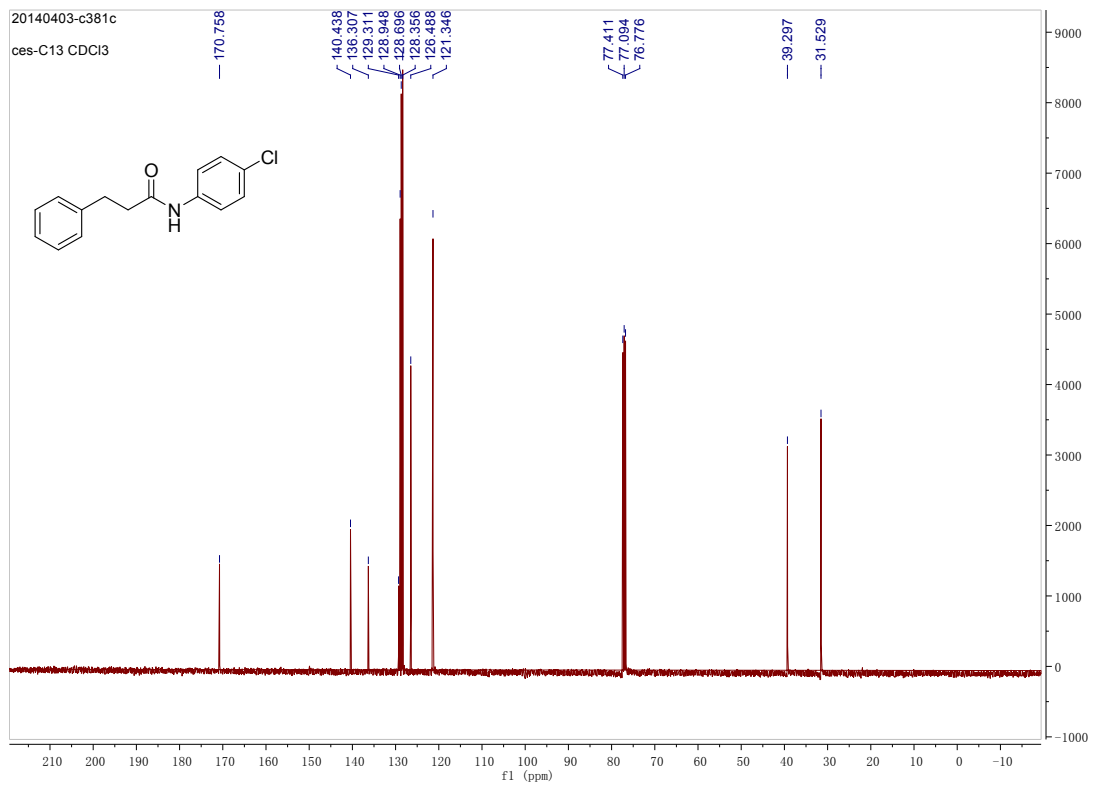

<sup>1</sup>H NMR (400 MHz, CDCl<sub>3</sub>) of **3o**

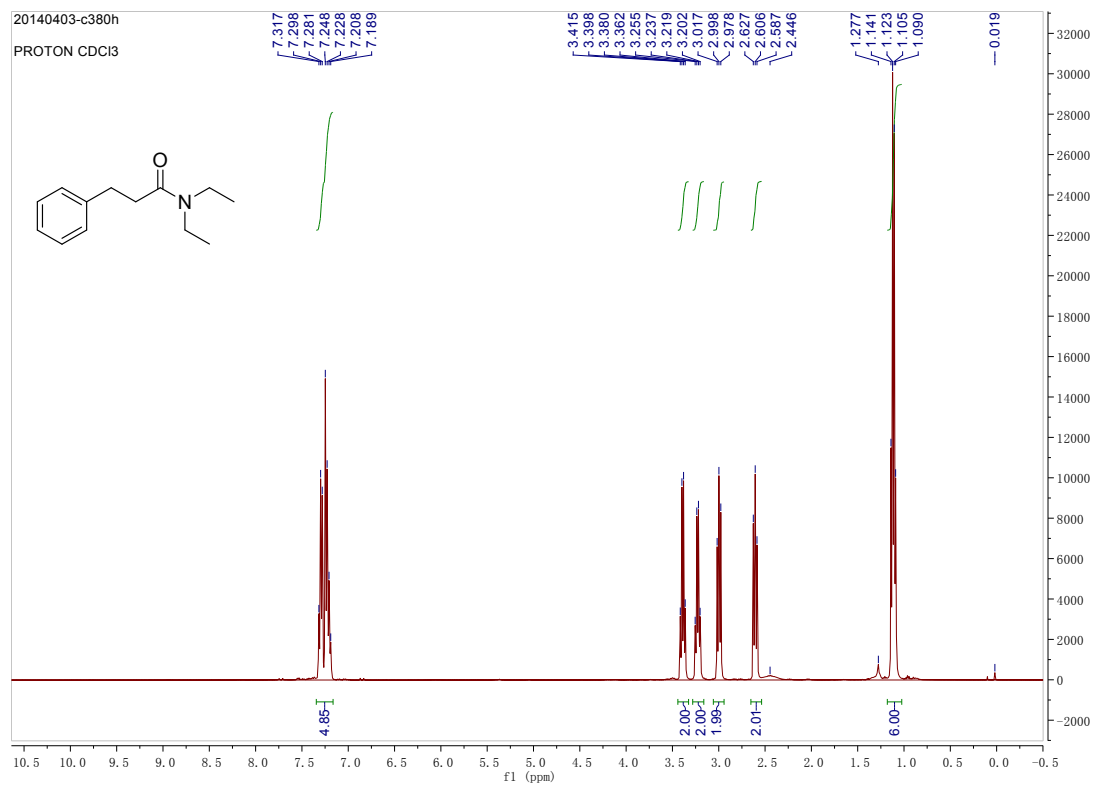

<sup>13</sup>C NMR (101 MHz, CDCl<sub>3</sub>) of **3o**

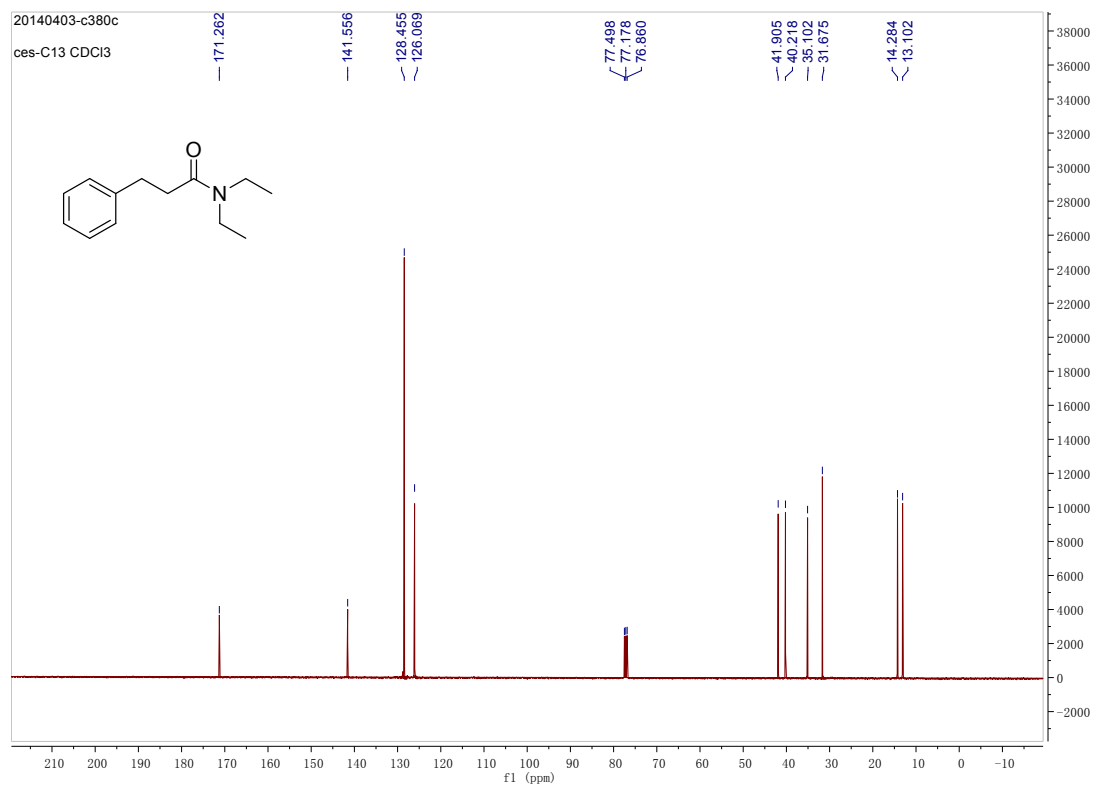

<sup>1</sup>H NMR (400 MHz, CDCl<sub>3</sub>) of **3p**

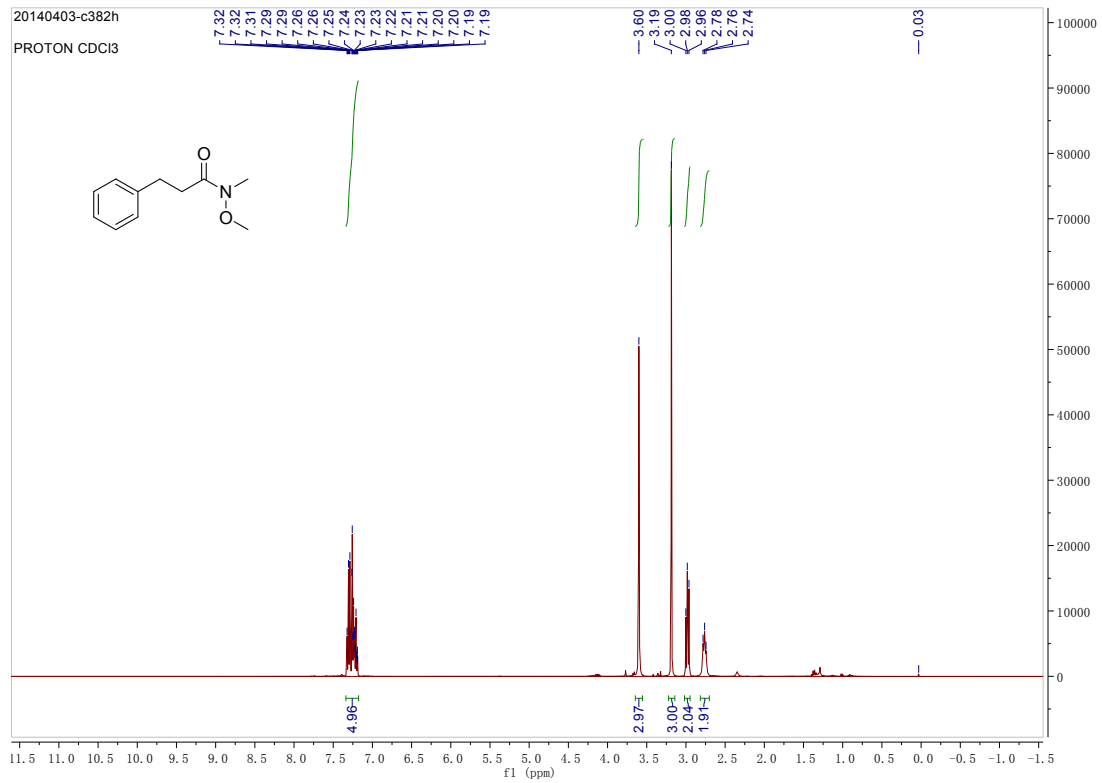

<sup>13</sup>C NMR (101 MHz, CDCl<sub>3</sub>) of **3p**

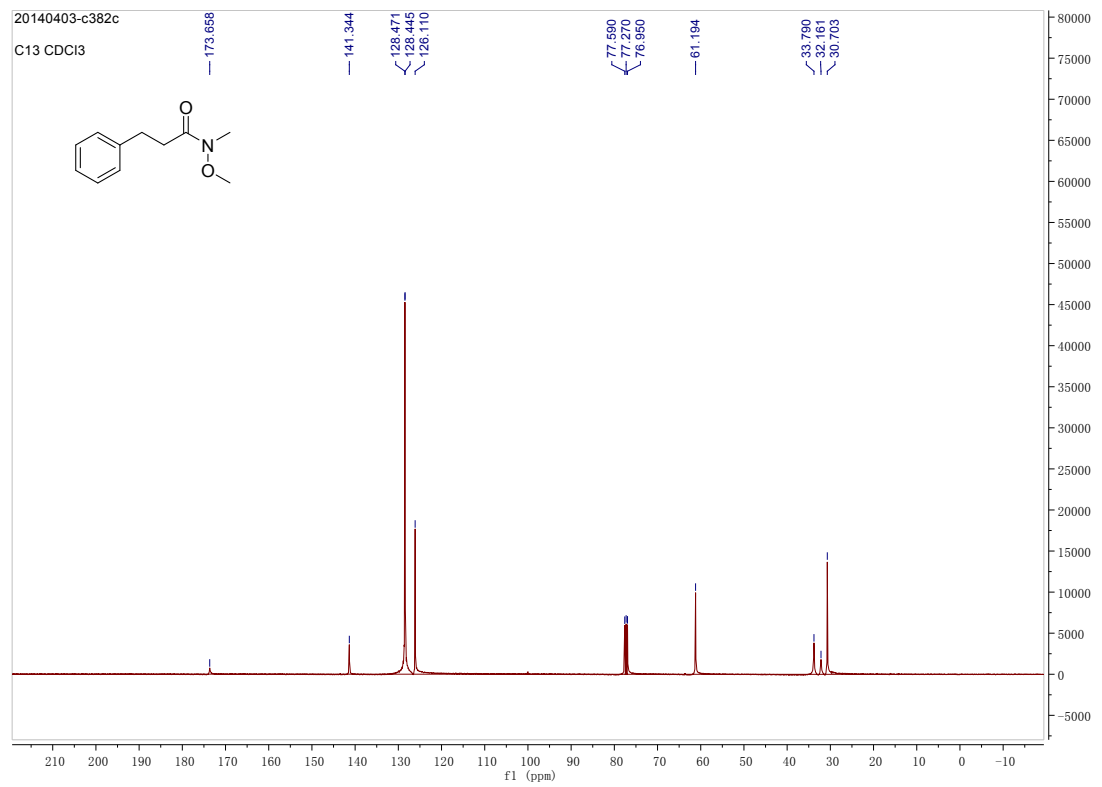

### <sup>1</sup>H NMR (400 MHz, CDCl<sub>3</sub>) of **3q**

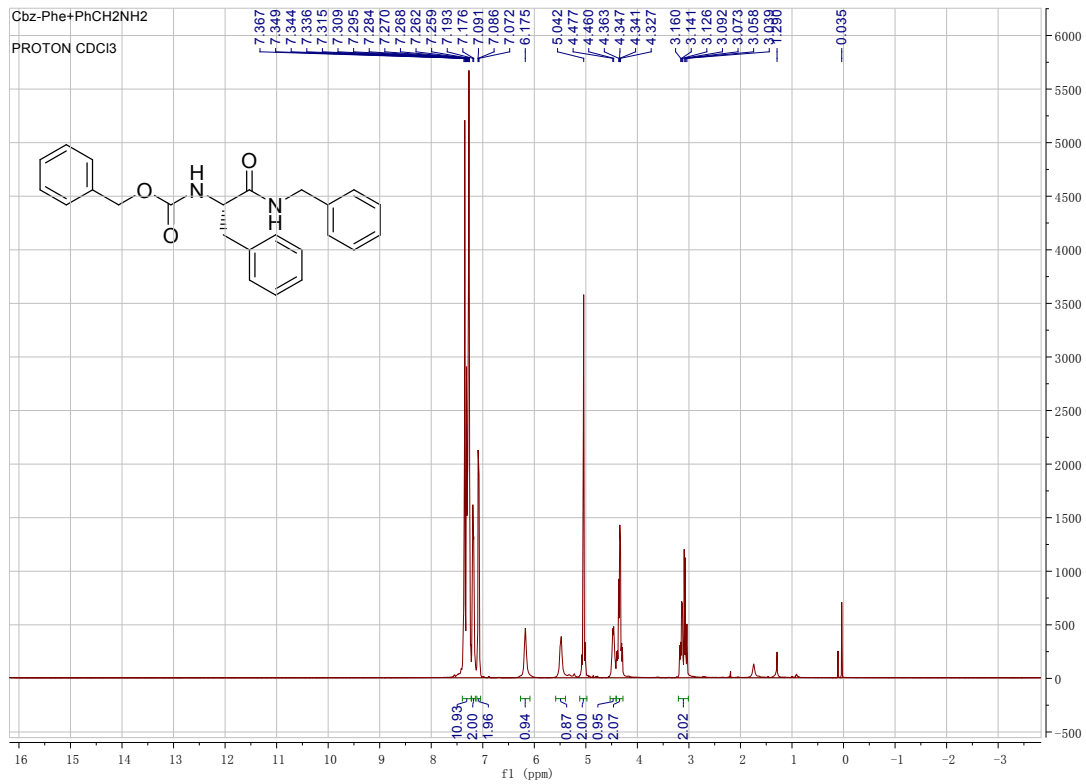

### <sup>13</sup>C NMR (101 MHz, CDCl<sub>3</sub>) of **3q**

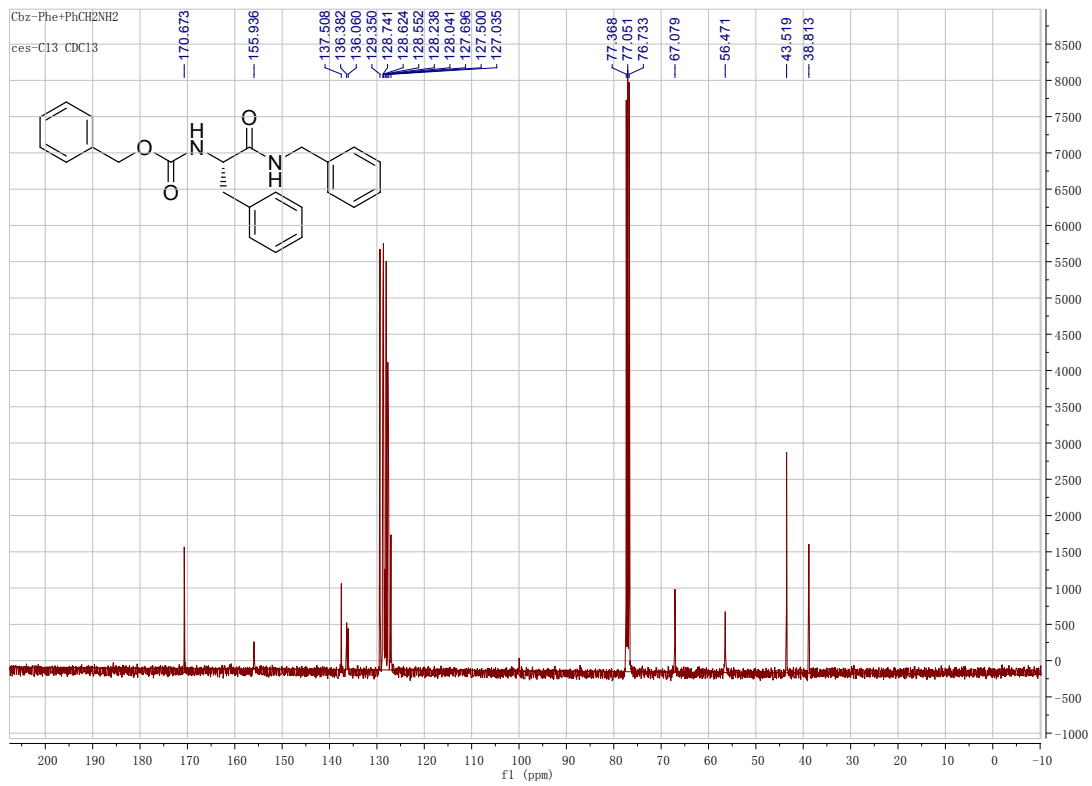

### The HPLC result of the racemer of **3q**

Conditions: Chiralcel AS column, hexane:IPA=90:10,  $v = 1.0$  mL/min

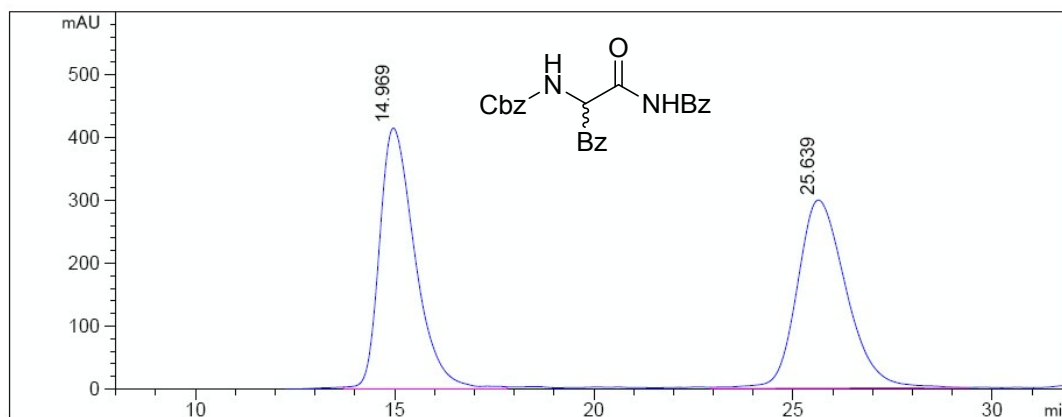

| Entry # | RetTime [min] | Area [mAU*s] | Height [mAU] | Width [min] | Area % |
|---------|---------------|--------------|--------------|-------------|--------|
| 1       | 14.97         | 25698.631    | 414.859      | 1.032       | 50.14  |
| 2       | 25.64         | 25552.738    | 299.293      | 1.304       | 49.85  |

### The HPLC result of the racemer of **3q**

Conditions: Chiralcel AS column, hexane:IPA=90:10,  $v = 1.0$  mL/min

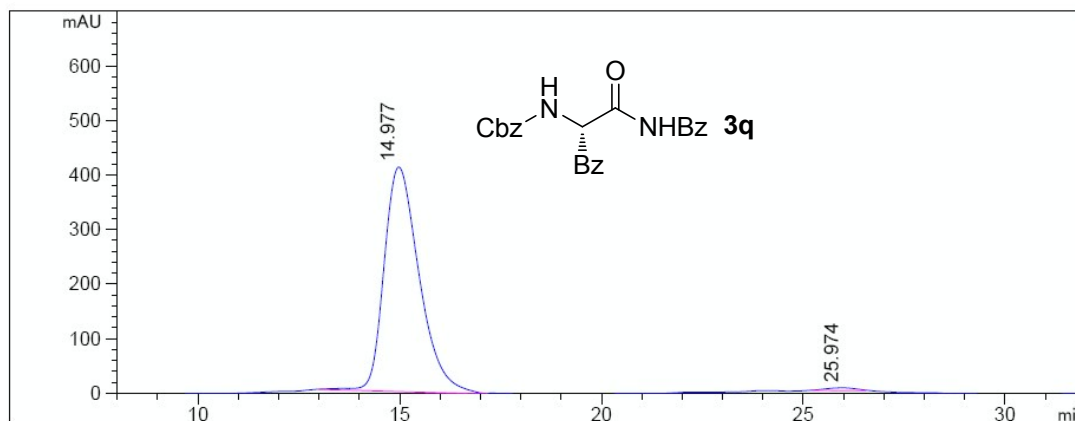

| Entry # | RetTime [min] | Area [mAU*s] | Height [mAU] | Width [min] | Area % |
|---------|---------------|--------------|--------------|-------------|--------|
| 1       | 14.98         | 24920.051    | 411.338      | 1.010       | 98.87  |
| 2       | 25.97         | 283.455      | 5.377        | 0.879       | 1.12   |



### <sup>1</sup>H NMR (400 MHz, CDCl<sub>3</sub>) of 3r

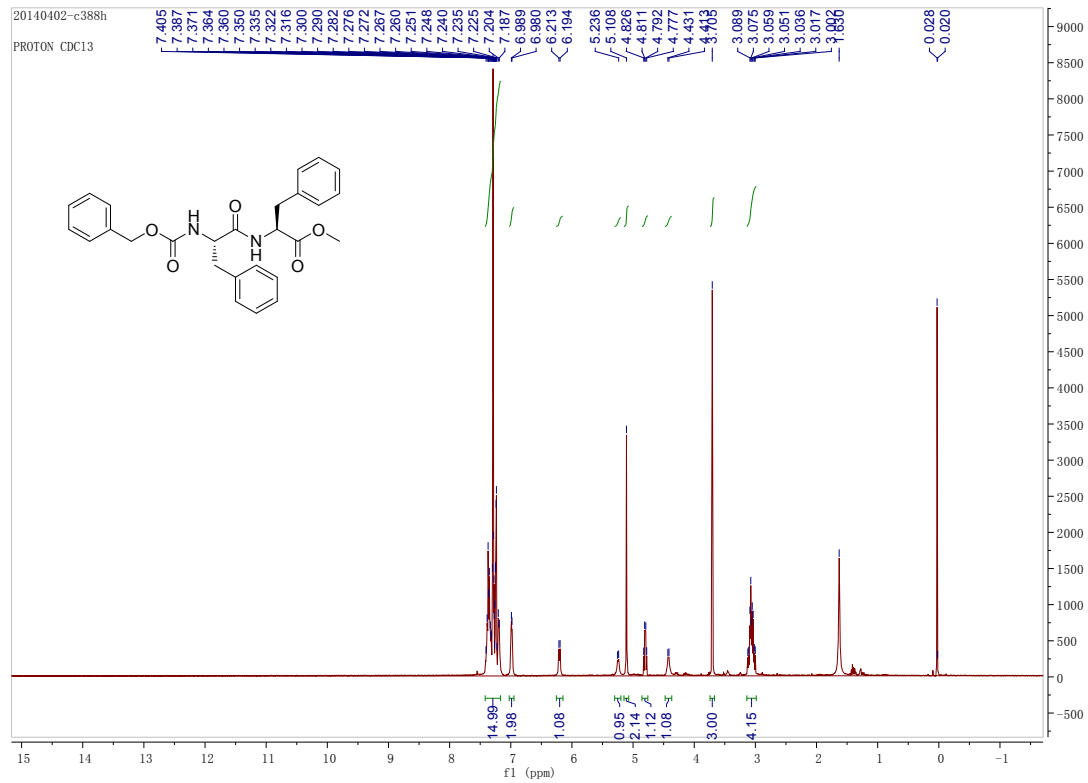

### <sup>13</sup>C NMR (101 MHz, CDCl<sub>3</sub>) of 3r

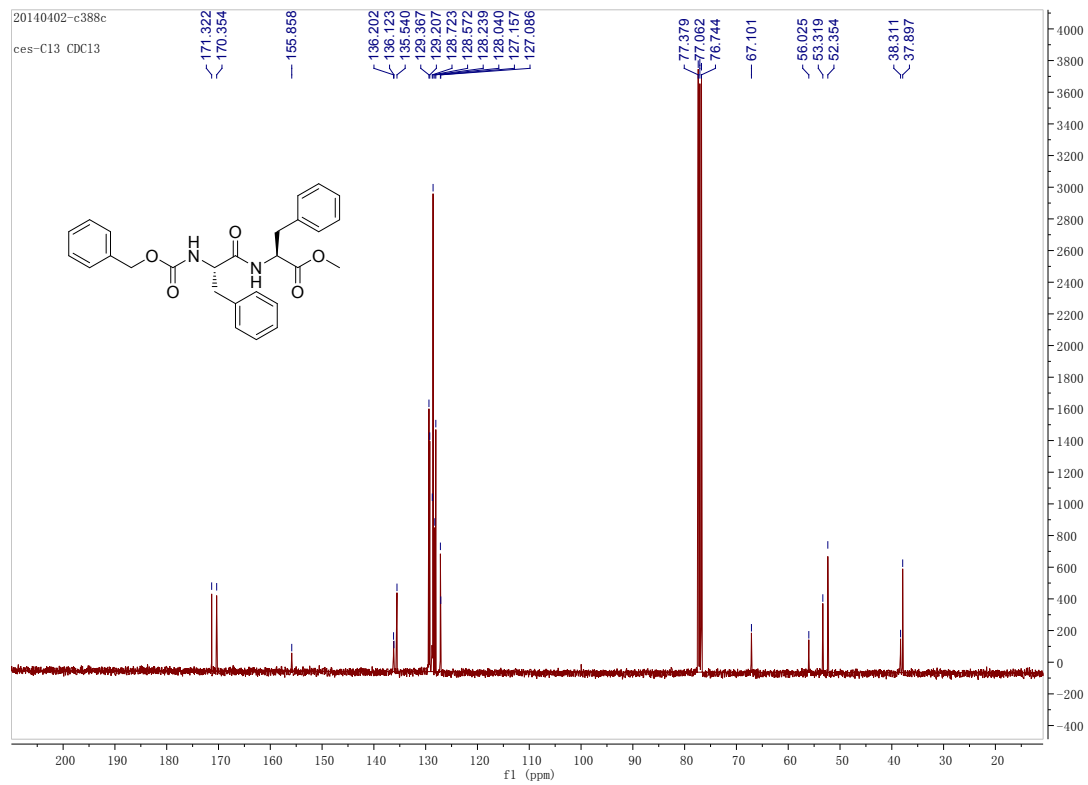

### The HPLC result of the diastereomer of **3r**

Conditions: Chiralcel OD column, hexanes:IPA=90:10,  $v = 1.0$  mL/min

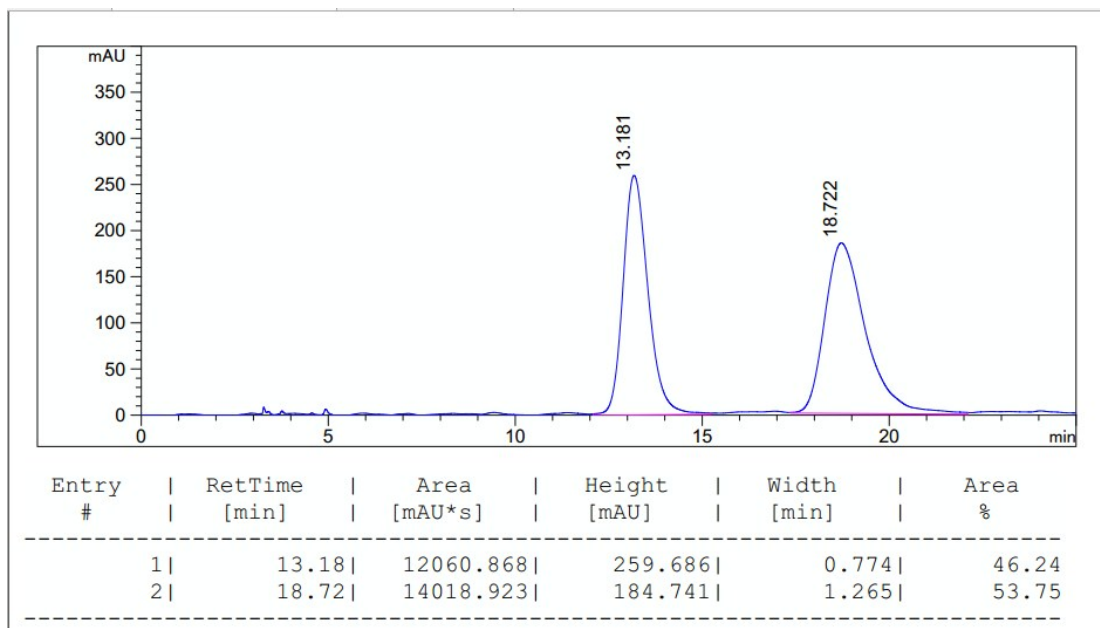

### The HPLC result of **3r**

Conditions: Chiralcel OD column, hexanes:IPA=90:10,  $v = 1.0$  mL/min

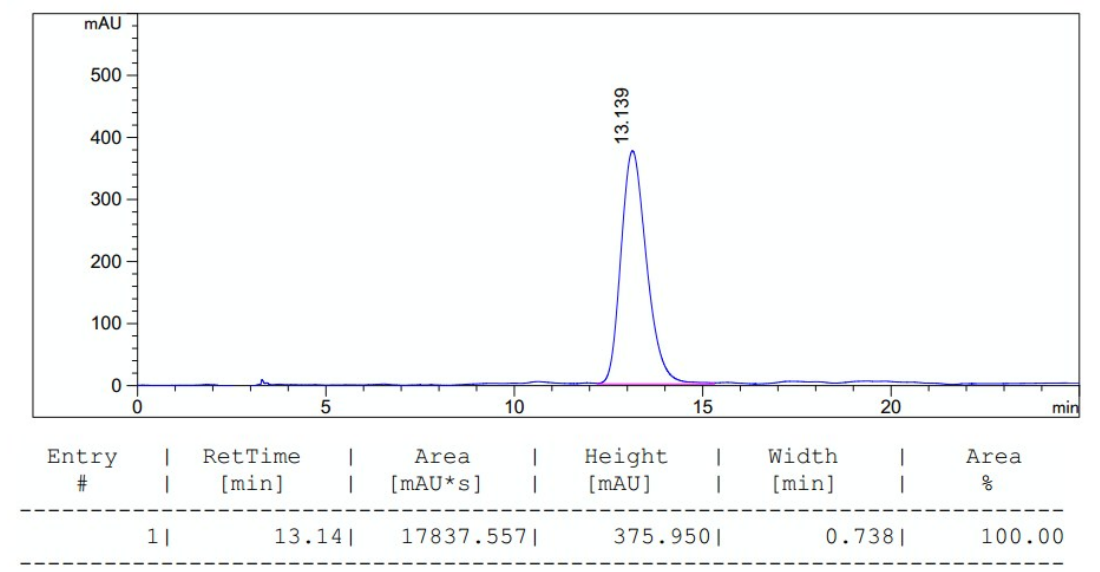

Supplement: c5ra18459b1.pdf [file c5ra18459b1.pdf]
